# Supplementary material for: Assessing the causal role of epigenetic clocks in the development of multiple cancers: a Mendelian randomization study
Source: eLife. 2022 Mar 29;11:e75374. doi: 10.7554/eLife.75374 (PMC9049976; doi:10.7554/eLife.75374)
Supplement: Supplementary file 1. — Table s1. Genetic instruments for epigenetic age acceleration. Table s2. Power calculations. Table s3. MR for genetically predicted epigenetic age acceleration and cancer (international consortia). Table s4. MR for genetically predicted epigenetic age acceleration and cancer (UK Biobank). Table s5. MR for genetically predicted epigenetic age acceleration and cancer (FinnGen). Table s6. Fixed effect meta-analysis of MR for genetically predicted epigenetic age acceleration and cancer (Consortia, UK Biobank and FinnGen). Table s7. Mendelian randomization analyses for the genetically predicted effects of epigenetic clock acceleration on negative control outcomes. Table s8. Mendelian randomization analyses for the genetically predicted effects of epigenetic clock acceleration on potential confounders of the association between epigenetic age acceleration and cancer. Table s9. Single SNP analyses for the genetically predicted effects of epigenetic clock acceleration on multiple cancers. Table s10. Cochran’s Q and MR-Egger Intercept for the genetically predicted effects of epigenetic age acceleration on multiple cancers. Table s11. MR for genetically predicted epigenetic age acceleration and cancer subtypes (international consortia). Table s12. MR for genetically predicted epigenetic age acceleration and parental history of cancer (UK Biobank). Table s13. LD Score regression results for genetically predicted epigenetic age acceleration and cancer. Table s14. Bidirectional MR of epigenetic age acceleration and telomere length. Table s15. Steiger filtering for Bidirectional MR of epigenetic age acceleration and telomere length. Table s16. Bidirectional MR of epigenetic age acceleration and telomere length after Steiger filtering. Table s17. Preexisting evidence on epigenetic age acceleration and cancer. [file elife-75374-supp1.xlsx]

## Sheet: Index
Supplementary File 1 Index
S1.- Table 1. Genetic instruments for epigenetic age acceleration
S2.- Table 2. Power calculations
S3.- Table 3. MR for genetically predicted epigenetic age acceleration and cancer (international consortia)
S4.- Table 4. MR for genetically predicted epigenetic age acceleration and cancer (UK Biobank)
S5.- Table 5. MR for genetically predicted epigenetic age acceleration and cancer (FinnGen)
S6.- Table 6. Fixed effect meta-analysis of MR for genetically predicted epigenetic age acceleration and cancer (Consortia, UK Biobank and FinnGen)
S7.- Table 7. Mendelian randomization analyses for the genetically predicted effects of epigenetic clock acceleration on negative control outcomes
S8.- Table 8. Mendelian randomization analyses for the genetically predicted effects of epigenetic clock acceleration on potential confounders of the association between epigenetic age acceleration and cancer
S9.- Table 9. Single SNP analyses for the genetically predicted effects of epigenetic clock acceleration on multiple cancers
S10.- Table 10. Cochran's Q and MR-Egger Intercept for the genetically predicted effects of epigenetic age acceleration on multiple cancers
S11.- Table 11. MR for genetically predicted epigenetic age acceleration and cancer subtypes (international consortia)
S12.- Table 12. MR for genetically predicted epigenetic age acceleration and parental history of cancer (UK Biobank)
S13.- Table 13. LD Score regression results for genetically predicted epigenetic age acceleration and cancer
S14.- Table 14. Bidirectional MR of epigenetic age acceleration and telomere length
S15.- Table 15. Steiger filtering for Bidirectional MR of epigenetic age acceleration and telomere length
S16.- Table 16. Bidirectional MR of epigenetic age acceleration and telomere length after Steiger filtering
S17.- Table 17. Preexisting evidence on epigenetic age acceleration and cancer

## Sheet: S1. Genetic Instruments
Table 1. Genetic instruments for epigenetic age acceleration
Gene	SNP	chr.exposure	pos.exposure	effect_allele.exposure	other_allele.exposure	eaf.exposure	beta.exposure	se.exposure	pval.exposure	samplesize.exposure	exposure	mr_keep.exposure	pval_origin.exposure	id.exposure	R2	F
CCDC162P	rs9386796	6	109618704	T	C	0.4597	0.1983	0.0294	1.64e-11	32418	GrimAge acceleration	TRUE	reported	GrimAge	0.00140138	45.4908
POU5F1	rs887466	6	31143511	G	A	0.6185	0.1928	0.031	5.092e-10	30674	GrimAge acceleration	TRUE	reported	GrimAge	0.00125943	38.6779
PSMD3	rs4065321	17	38143548	C	T	0.4667	0.1703	0.0296	8.776e-09	32420	GrimAge acceleration	TRUE	reported	GrimAge	0.00101998	33.0993
LINC01475	rs17094148	10	101280279	G	A	0.2933	0.18	0.0323	2.547e-08	31838	GrimAge acceleration	TRUE	reported	GrimAge	0.000974475	31.0537
OPALIN	rs10786282	10	98122808	G	A	0.7876	0.36	0.0362	2.609e-23	31412	HannumAge acceleration	TRUE	reported	Hannum	0.00313854	98.8918
ZNF25	rs1005277	10	38218259	A	C	0.2982	0.3006	0.033	8.919e-20	28556	HannumAge acceleration	TRUE	reported	Hannum	0.00289729	82.9697
RP11-867G23.13	rs12417758	11	66076360	C	T	0.4539	0.2093	0.0304	6.215e-12	28548	HannumAge acceleration	TRUE	reported	Hannum	0.00165766	47.3981
NFKB1	rs1598856	4	103446115	A	G	0.4492	0.1858	0.0296	3.632e-10	31986	HannumAge acceleration	TRUE	reported	Hannum	0.00123031	39.3986
-	rs3093956	6	31426967	C	T	0.1858	0.2428	0.0396	8.391e-10	27291	HannumAge acceleration	TRUE	reported	Hannum	0.00137559	37.5902
AC104623.2	rs4383328	2	16693124	T	A	0.7152	0.1889	0.0329	9.572e-09	31010	HannumAge acceleration	TRUE	reported	Hannum	0.00106196	32.9643
KLF14	rs111731678	7	130418744	T	A	0.8061	0.2266	0.0398	1.258e-08	27213	HannumAge acceleration	TRUE	reported	Hannum	0.00118976	32.4132
ARHGAP22	rs4838595	10	49675247	C	T	0.8783	0.2576	0.0453	1.291e-08	31420	HannumAge acceleration	TRUE	reported	Hannum	0.00102812	32.3346
ZFHX3	rs34970912	16	73068163	G	C	0.0352	0.5213	0.0939	2.875e-08	26171	HannumAge acceleration	TRUE	reported	Hannum	0.00117629	30.8185
NHLRC1	rs10949481	6	18121029	A	T	0.9468	1.0823	0.0699	4.56e-54	30685	Intrinsic HorvathAge acceleration	TRUE	reported	IEAA	0.00775238	239.725
SELP	rs3917672	1	169592981	G	A	0.5142	0.2622	0.0304	5.946e-18	31022	Intrinsic HorvathAge acceleration	TRUE	reported	IEAA	0.00239226	74.3858
RIPPLY3	rs57941717	21	38374179	T	G	0.2528	0.2908	0.0357	3.71e-16	28971	Intrinsic HorvathAge acceleration	TRUE	reported	IEAA	0.00228505	66.3472
ZFP57	rs10447389	6	25642577	G	A	0.7313	0.2764	0.034	4.418e-16	32017	Intrinsic HorvathAge acceleration	TRUE	reported	IEAA	0.00205988	66.0832
LINC01214	rs6414374	3	150001224	A	G	0.1625	0.3214	0.0418	1.421e-14	31491	Intrinsic HorvathAge acceleration	TRUE	reported	IEAA	0.00187386	59.1169
AC104623.2	rs4240228	2	16688759	T	G	0.7168	0.2547	0.0334	2.466e-14	33888	Intrinsic HorvathAge acceleration	TRUE	reported	IEAA	0.00171307	58.1486
P2RX3	rs10732882	11	57111693	G	T	0.5941	0.2405	0.0318	3.68e-14	28566	Intrinsic HorvathAge acceleration	TRUE	reported	IEAA	0.00199829	57.1933
C1orf132	rs7550821	1	208029947	C	T	0.7559	0.2551	0.035	3.27e-13	34040	Intrinsic HorvathAge acceleration	TRUE	reported	IEAA	0.00155818	53.1202
KPNA4	rs7627756	3	160217483	A	G	0.5615	0.2162	0.0301	6.275e-13	34451	Intrinsic HorvathAge acceleration	TRUE	reported	IEAA	0.00149529	51.5885
LINC01478	rs1511762	18	42119324	T	C	0.2186	0.2642	0.0374	1.532e-12	29544	Intrinsic HorvathAge acceleration	TRUE	reported	IEAA	0.00168624	49.8991
TERT	rs2736099	5	1287340	A	G	0.3538	0.2326	0.0334	3.47e-12	29993	Intrinsic HorvathAge acceleration	TRUE	reported	IEAA	0.00161438	48.4951
AKIRIN1	rs12043492	1	39457006	T	C	0.4212	0.2166	0.0313	4.352e-12	31012	Intrinsic HorvathAge acceleration	TRUE	reported	IEAA	0.0015418	47.8851
CECR6	rs75243280	22	17601466	C	T	0.3314	0.2323	0.0339	7.367e-12	28482	Intrinsic HorvathAge acceleration	TRUE	reported	IEAA	0.00164594	46.9536
RPN1	rs2492286	3	128336298	T	G	0.1519	0.2808	0.0428	5.293e-11	31010	Intrinsic HorvathAge acceleration	TRUE	reported	IEAA	0.00138613	43.0406
ENO1	rs6577536	1	8910110	A	G	0.4843	0.1968	0.0302	6.728e-11	31572	Intrinsic HorvathAge acceleration	TRUE	reported	IEAA	0.00134323	42.4628
SMARCC1	rs79111787	3	47715545	C	T	0.0322	0.9076	0.1412	1.275e-10	18474	Intrinsic HorvathAge acceleration	TRUE	reported	IEAA	0.00223146	41.3117
ATP8B4	rs12903325	15	50353277	G	T	0.2404	0.2216	0.0357	5.476e-10	31450	Intrinsic HorvathAge acceleration	TRUE	reported	IEAA	0.00122363	38.5279
EDARADD	rs1726672	1	236519502	C	T	0.6964	0.2038	0.0329	6.047e-10	30627	Intrinsic HorvathAge acceleration	TRUE	reported	IEAA	0.00125132	38.3697
RP11-556I14.2	rs144317085	4	105806108	A	T	0.9612	0.5136	0.0831	6.424e-10	31143	Intrinsic HorvathAge acceleration	TRUE	reported	IEAA	0.00122505	38.1962
RP11-412D9.4	rs10735418	12	107343376	T	C	0.6278	0.1954	0.0321	1.14e-09	28979	Intrinsic HorvathAge acceleration	TRUE	reported	IEAA	0.00127703	37.0518
MECOM	rs1488106	3	168859006	T	C	0.3721	0.1827	0.0311	4.246e-09	33885	Intrinsic HorvathAge acceleration	TRUE	reported	IEAA	0.00101744	34.5089
PPP1R17	rs12666349	7	31728180	T	C	0.8028	0.2548	0.0436	5.227e-09	28162	Intrinsic HorvathAge acceleration	TRUE	reported	IEAA	0.00121126	34.1503
PBX1	rs2275558	1	164529120	G	A	0.7788	0.2335	0.0402	6.443e-09	27039	Intrinsic HorvathAge acceleration	TRUE	reported	IEAA	0.0012462	33.7357
ZFHX3	rs34003787	16	73071381	T	C	0.0862	0.3239	0.0581	2.54e-08	28380	Intrinsic HorvathAge acceleration	TRUE	reported	IEAA	0.00109391	31.077
TPMT	rs1142345	6	18130918	T	C	0.9454	0.8235	0.0871	3.351e-21	30646	PhenoAge acceleration	TRUE	reported	PhenoAge	0.00290839	89.3846
LINC01478	rs7228835	18	41969071	G	C	0.8783	0.5144	0.061	3.304e-17	28862	PhenoAge acceleration	TRUE	reported	PhenoAge	0.0024578	71.107
EDARADD	rs678553	1	236525447	T	C	0.6892	0.3265	0.0412	2.27e-15	30527	PhenoAge acceleration	TRUE	reported	PhenoAge	0.00205303	62.7977
ASPA	rs3829957	17	3378876	C	T	0.8026	0.3796	0.0482	3.508e-15	31448	PhenoAge acceleration	TRUE	reported	PhenoAge	0.00196838	62.0198
RN7SL475P	rs752223	1	60433076	G	A	0.9182	0.5602	0.072	7.2e-15	30223	PhenoAge acceleration	TRUE	reported	PhenoAge	0.00199901	60.533
PURB	rs1990053	7	44925896	A	G	0.4231	0.2573	0.0384	2.048e-11	32409	PhenoAge acceleration	TRUE	reported	PhenoAge	0.00138341	44.8942
LINC01475	rs11190127	10	101271982	A	C	0.3786	0.2484	0.0397	3.834e-10	29057	PhenoAge acceleration	TRUE	reported	PhenoAge	0.00134551	39.1464
AC010880.1	rs6531114	2	16617781	C	T	0.7367	0.2542	0.0424	2.065e-09	33878	PhenoAge acceleration	TRUE	reported	PhenoAge	0.00105984	35.9413
DIP2C	rs11253338	10	759559	T	C	0.184	0.2846	0.0494	8.485e-09	28581	PhenoAge acceleration	TRUE	reported	PhenoAge	0.00115994	33.1883
MSI2	rs116853700	17	55466295	A	G	0.0425	0.5517	0.0976	1.592e-08	28126	PhenoAge acceleration	TRUE	reported	PhenoAge	0.00113476	31.9503
UBASH3B	rs73028070	11	122681835	G	A	0.9214	0.4329	0.0768	1.738e-08	28382	PhenoAge acceleration	TRUE	reported	PhenoAge	0.00111821	31.7704
* R2 represents the proportion of the variance in the exposure explained by the genetic variant (SNP). It was calculated by means of the following formula: R2= (2β^2×MAF×(1-MAF))/(2β^2×MAF×(1-MAF)+2N×MAF×(1-MAF)×SE^2 )
* F represents the strength of the instrument. It was calculated by means of the following formula: F= (R^2×(N-2))/(1-R^2)

## Sheet: S2. Power calculations
Table 2. Power calculations
POWER CALCULATIONS FOR METAANALYSIS (FINNGEN, UKB and CONSORTIA)
Colorectal Cancer (GECCO, FinnGen)
Exposure/genetic instrument	R-squared (of variance in epigenetic clock phenotype)	N total across cancer dataset	Proportion of cases across cancer datasets	Expected OR	N required for 80% power	Power at actual N	OR we can detect at 80% power	Ncases	Ncontrols
Clock 1 - GrimAge	0.0047	302506	0.202155	1.2	280556	0.83	1.2	61153	241353
Clock 2 - Hannum	0.0148	302506	0.202155	1.2	89096	1	1.11	61153	241353
Clock 3 - IEAA	0.0441	302506	0.202155	1.2	29901	1	1.06	61153	241353
Clock 4 - PhenoAge	0.0186	302506	0.202155	1.2	70894	1	1.1	61153	241353
Lung Cancer (ILCCO, UKB, FinnGen)
Exposure/genetic instrument	R-squared (of variance in epigenetic clock phenotype)	N total across cancer dataset	Proportion of cases across cancer datasets	Expected OR	N required for 80% power	Power at actual N	OR we can detect at 80% power	Ncases	Ncontrols
Clock 1 - GrimAge	0.0047	577510	0.0271857	1.2	1604720	0.39	1.39	15700	561810
Clock 2 - Hannum	0.0148	577510	0.0271857	1.2	509608	0.85	1.21	15700	561810
Clock 3 - IEAA	0.0441	577510	0.0271857	1.2	171025	1	1.11	15700	561810
Clock 4 - PhenoAge	0.0186	577510	0.0271857	1.2	405494	0.92	1.18	15700	561810
Prostate Cancer (PRACTICAL, UKB, FinnGen)
Exposure/genetic instrument	R-squared (of variance in epigenetic clock phenotype)	N total across cancer dataset	Proportion of cases across cancer datasets	Expected OR	N required for 80% power	Power at actual N	OR we can detect at 80% power	Ncases	Ncontrols
Clock 1 - GrimAge	0.0047	403875	0.234209	1.2	253561	0.94	1.16	94591	309284
Clock 2 - Hannum	0.0148	403875	0.234209	1.2	80523	1	1.09	94591	309284
Clock 3 - IEAA	0.0441	403875	0.234209	1.2	27024	1	1.05	94591	309284
Clock 4 - PhenoAge	0.0186	403875	0.234209	1.2	64072	1	1.08	94591	309284
Ovarian Cancer (OCAC, UKB, FinnGen)
Exposure/genetic instrument	R-squared (of variance in epigenetic clock phenotype)	N total across cancer dataset	Proportion of cases across cancer datasets	Expected OR	N required for 80% power	Power at actual N	OR we can detect at 80% power	Ncases	Ncontrols
Clock 1 - GrimAge	0.0047	366231	0.0749418	1.2	619048	0.58	1.29	27446	338785
Clock 2 - Hannum	0.0148	366231	0.0749418	1.2	196590	0.97	1.16	27446	338785
Clock 3 - IEAA	0.0441	366231	0.0749418	1.2	65976	1	1.09	27446	338785
Clock 4 - PhenoAge	0.0186	366231	0.0749418	1.2	156427	0.99	1.14	27446	338785
Breast Cancer (BCAC, UKB, FinnGen)
Exposure/genetic instrument	R-squared (of variance in epigenetic clock phenotype)	N total across cancer dataset	Proportion of cases across cancer datasets	Expected OR	N required for 80% power	Power at actual N	OR we can detect at 80% power	Ncases	Ncontrols
Clock 1 - GrimAge	0.0047	549075	0.264549	1.2	236242	0.99	1.13	145257	403818
Clock 2 - Hannum	0.0148	549075	0.264549	1.2	75023	1	1.07	145257	403818
Clock 3 - IEAA	0.0441	549075	0.264549	1.2	25178	1	1.04	145257	403818
Clock 4 - PhenoAge	0.0186	549075	0.264549	1.2	59696	1	1.07	145257	403818

## Sheet: S3. MR Cancer (consortia)
Table 3. MR for genetically predicted epigenetic age acceleration and cancer (international consortia)
id.exposure	id.outcome	outcome	exposure	method	nsnp	b	se	pval
GrimAge	ieu-a-1120	Ovarian cancer || id:ieu-a-1120	GrimAge acceleration	Inverse variance weighted	4	-0.0354855	0.0364837	0.330733
GrimAge	ieu-a-1120	Ovarian cancer || id:ieu-a-1120	GrimAge acceleration	MR Egger	4	-0.203242	0.608812	0.770258
GrimAge	ieu-a-1120	Ovarian cancer || id:ieu-a-1120	GrimAge acceleration	Weighted median	4	-0.0311134	0.0450557	0.489846
GrimAge	ieu-a-1120	Ovarian cancer || id:ieu-a-1120	GrimAge acceleration	Weighted mode	4	-0.0189674	0.0597333	0.771655
GrimAge	ieu-a-1126	Breast cancer (Combined Oncoarray; iCOGS; GWAS meta analysis) || id:ieu-a-1126	GrimAge acceleration	Inverse variance weighted	4	-0.0436824	0.0171862	0.0110308
GrimAge	ieu-a-1126	Breast cancer (Combined Oncoarray; iCOGS; GWAS meta analysis) || id:ieu-a-1126	GrimAge acceleration	MR Egger	4	-0.228581	0.285974	0.507957
GrimAge	ieu-a-1126	Breast cancer (Combined Oncoarray; iCOGS; GWAS meta analysis) || id:ieu-a-1126	GrimAge acceleration	Weighted median	4	-0.045347	0.0207766	0.029065
GrimAge	ieu-a-1126	Breast cancer (Combined Oncoarray; iCOGS; GWAS meta analysis) || id:ieu-a-1126	GrimAge acceleration	Weighted mode	4	-0.0528204	0.0280442	0.156159
GrimAge	ieu-a-966	Lung cancer || id:ieu-a-966	GrimAge acceleration	Inverse variance weighted	3	-0.0385127	0.0572361	0.501028
GrimAge	ieu-a-966	Lung cancer || id:ieu-a-966	GrimAge acceleration	MR Egger	3	0.829277	0.884467	0.520495
GrimAge	ieu-a-966	Lung cancer || id:ieu-a-966	GrimAge acceleration	Weighted median	3	-0.0366079	0.0683448	0.592211
GrimAge	ieu-a-966	Lung cancer || id:ieu-a-966	GrimAge acceleration	Weighted mode	3	-0.017568	0.0873623	0.859221
GrimAge	ieu-b-85	Prostate cancer || id:ieu-b-85	GrimAge acceleration	Inverse variance weighted	4	-0.0742932	0.0416954	0.0747809
GrimAge	ieu-b-85	Prostate cancer || id:ieu-b-85	GrimAge acceleration	MR Egger	4	0.0806981	0.847773	0.932844
GrimAge	ieu-b-85	Prostate cancer || id:ieu-b-85	GrimAge acceleration	Weighted median	4	-0.0534529	0.0309242	0.0838962
GrimAge	ieu-b-85	Prostate cancer || id:ieu-b-85	GrimAge acceleration	Weighted mode	4	-0.0308691	0.0466677	0.555581
GrimAge	XN1C5M	Colorectal cancer	GrimAge acceleration	Inverse variance weighted	4	0.123144	0.0417262	0.00316501
GrimAge	XN1C5M	Colorectal cancer	GrimAge acceleration	MR Egger	4	0.833712	0.68978	0.3503
GrimAge	XN1C5M	Colorectal cancer	GrimAge acceleration	Weighted median	4	0.110658	0.0348015	0.00147424
GrimAge	XN1C5M	Colorectal cancer	GrimAge acceleration	Weighted mode	4	0.104398	0.052154	0.139094
Hannum	ieu-a-1120	Ovarian cancer || id:ieu-a-1120	HannumAge acceleration	Inverse variance weighted	9	0.00355687	0.0215012	0.868608
Hannum	ieu-a-1120	Ovarian cancer || id:ieu-a-1120	HannumAge acceleration	MR Egger	9	-0.0290285	0.0818794	0.733383
Hannum	ieu-a-1120	Ovarian cancer || id:ieu-a-1120	HannumAge acceleration	Weighted median	9	0.0151231	0.0281516	0.591128
Hannum	ieu-a-1120	Ovarian cancer || id:ieu-a-1120	HannumAge acceleration	Weighted mode	9	0.0164202	0.0536215	0.767252
Hannum	ieu-a-1126	Breast cancer (Combined Oncoarray; iCOGS; GWAS meta analysis) || id:ieu-a-1126	HannumAge acceleration	Inverse variance weighted	9	-0.00534899	0.0218041	0.806208
Hannum	ieu-a-1126	Breast cancer (Combined Oncoarray; iCOGS; GWAS meta analysis) || id:ieu-a-1126	HannumAge acceleration	MR Egger	9	0.157917	0.061249	0.0365642
Hannum	ieu-a-1126	Breast cancer (Combined Oncoarray; iCOGS; GWAS meta analysis) || id:ieu-a-1126	HannumAge acceleration	Weighted median	9	0.0249755	0.0150971	0.0980621
Hannum	ieu-a-1126	Breast cancer (Combined Oncoarray; iCOGS; GWAS meta analysis) || id:ieu-a-1126	HannumAge acceleration	Weighted mode	9	0.0282651	0.015419	0.104136
Hannum	ieu-a-966	Lung cancer || id:ieu-a-966	HannumAge acceleration	Inverse variance weighted	7	-0.00155523	0.0311192	0.960141
Hannum	ieu-a-966	Lung cancer || id:ieu-a-966	HannumAge acceleration	MR Egger	7	0.0735891	0.117051	0.557151
Hannum	ieu-a-966	Lung cancer || id:ieu-a-966	HannumAge acceleration	Weighted median	7	0.0124012	0.0384728	0.747197
Hannum	ieu-a-966	Lung cancer || id:ieu-a-966	HannumAge acceleration	Weighted mode	7	0.0149361	0.0501866	0.776035
Hannum	ieu-b-85	Prostate cancer || id:ieu-b-85	HannumAge acceleration	Inverse variance weighted	9	-0.017854	0.0258233	0.489319
Hannum	ieu-b-85	Prostate cancer || id:ieu-b-85	HannumAge acceleration	MR Egger	9	-0.000251182	0.104712	0.998153
Hannum	ieu-b-85	Prostate cancer || id:ieu-b-85	HannumAge acceleration	Weighted median	9	0.0083807	0.0183152	0.647253
Hannum	ieu-b-85	Prostate cancer || id:ieu-b-85	HannumAge acceleration	Weighted mode	9	0.0157711	0.0190996	0.432891
Hannum	XN1C5M	Colorectal cancer	HannumAge acceleration	Inverse variance weighted	9	0.0101156	0.0314422	0.747665
Hannum	XN1C5M	Colorectal cancer	HannumAge acceleration	MR Egger	9	0.0402586	0.126245	0.759113
Hannum	XN1C5M	Colorectal cancer	HannumAge acceleration	Weighted median	9	-0.0151193	0.0203051	0.45651
Hannum	XN1C5M	Colorectal cancer	HannumAge acceleration	Weighted mode	9	-0.0186522	0.0200735	0.37997
IEAA	ieu-a-1120	Ovarian cancer || id:ieu-a-1120	Intrinsic HorvathAge acceleration	Inverse variance weighted	23	-0.000365802	0.0146725	0.98011
IEAA	ieu-a-1120	Ovarian cancer || id:ieu-a-1120	Intrinsic HorvathAge acceleration	MR Egger	23	0.0380894	0.0389139	0.338815
IEAA	ieu-a-1120	Ovarian cancer || id:ieu-a-1120	Intrinsic HorvathAge acceleration	Weighted median	23	0.0140804	0.0182538	0.440488
IEAA	ieu-a-1120	Ovarian cancer || id:ieu-a-1120	Intrinsic HorvathAge acceleration	Weighted mode	23	0.0208212	0.0316071	0.516893
IEAA	ieu-a-1126	Breast cancer (Combined Oncoarray; iCOGS; GWAS meta analysis) || id:ieu-a-1126	Intrinsic HorvathAge acceleration	Inverse variance weighted	23	-0.00716143	0.00766239	0.349984
IEAA	ieu-a-1126	Breast cancer (Combined Oncoarray; iCOGS; GWAS meta analysis) || id:ieu-a-1126	Intrinsic HorvathAge acceleration	MR Egger	23	-0.0110885	0.0212104	0.606594
IEAA	ieu-a-1126	Breast cancer (Combined Oncoarray; iCOGS; GWAS meta analysis) || id:ieu-a-1126	Intrinsic HorvathAge acceleration	Weighted median	23	-0.000444329	0.00923052	0.961607
IEAA	ieu-a-1126	Breast cancer (Combined Oncoarray; iCOGS; GWAS meta analysis) || id:ieu-a-1126	Intrinsic HorvathAge acceleration	Weighted mode	23	0.00168805	0.0132548	0.899817
IEAA	ieu-a-966	Lung cancer || id:ieu-a-966	Intrinsic HorvathAge acceleration	Inverse variance weighted	24	-0.0189552	0.0251562	0.451148
IEAA	ieu-a-966	Lung cancer || id:ieu-a-966	Intrinsic HorvathAge acceleration	MR Egger	24	-0.0389427	0.065384	0.55752
IEAA	ieu-a-966	Lung cancer || id:ieu-a-966	Intrinsic HorvathAge acceleration	Weighted median	24	0.00381711	0.0256475	0.881688
IEAA	ieu-a-966	Lung cancer || id:ieu-a-966	Intrinsic HorvathAge acceleration	Weighted mode	24	0.0172627	0.0392673	0.664315
IEAA	ieu-b-85	Prostate cancer || id:ieu-b-85	Intrinsic HorvathAge acceleration	Inverse variance weighted	23	-0.00424443	0.0106785	0.691016
IEAA	ieu-b-85	Prostate cancer || id:ieu-b-85	Intrinsic HorvathAge acceleration	MR Egger	23	-0.0135802	0.0283215	0.636537
IEAA	ieu-b-85	Prostate cancer || id:ieu-b-85	Intrinsic HorvathAge acceleration	Weighted median	23	-0.00234555	0.0118105	0.842577
IEAA	ieu-b-85	Prostate cancer || id:ieu-b-85	Intrinsic HorvathAge acceleration	Weighted mode	23	-0.00213304	0.0148978	0.887453
IEAA	XN1C5M	Colorectal cancer	Intrinsic HorvathAge acceleration	Inverse variance weighted	24	-0.00994845	0.0126484	0.431551
IEAA	XN1C5M	Colorectal cancer	Intrinsic HorvathAge acceleration	MR Egger	24	-0.0276467	0.0349832	0.437796
IEAA	XN1C5M	Colorectal cancer	Intrinsic HorvathAge acceleration	Weighted median	24	-0.00219212	0.0118995	0.853841
IEAA	XN1C5M	Colorectal cancer	Intrinsic HorvathAge acceleration	Weighted mode	24	-0.0141483	0.0174589	0.426029
PhenoAge	ieu-a-1120	Ovarian cancer || id:ieu-a-1120	PhenoAge acceleration	Inverse variance weighted	11	-0.0174742	0.0156153	0.263119
PhenoAge	ieu-a-1120	Ovarian cancer || id:ieu-a-1120	PhenoAge acceleration	MR Egger	11	0.0302528	0.0444884	0.513604
PhenoAge	ieu-a-1120	Ovarian cancer || id:ieu-a-1120	PhenoAge acceleration	Weighted median	11	-0.01428	0.0212228	0.501036
PhenoAge	ieu-a-1120	Ovarian cancer || id:ieu-a-1120	PhenoAge acceleration	Weighted mode	11	-0.00796501	0.0387335	0.841201
PhenoAge	ieu-a-1126	Breast cancer (Combined Oncoarray; iCOGS; GWAS meta analysis) || id:ieu-a-1126	PhenoAge acceleration	Inverse variance weighted	11	-0.00620577	0.00817796	0.447948
PhenoAge	ieu-a-1126	Breast cancer (Combined Oncoarray; iCOGS; GWAS meta analysis) || id:ieu-a-1126	PhenoAge acceleration	MR Egger	11	0.0257913	0.0224961	0.281165
PhenoAge	ieu-a-1126	Breast cancer (Combined Oncoarray; iCOGS; GWAS meta analysis) || id:ieu-a-1126	PhenoAge acceleration	Weighted median	11	-0.0145228	0.010142	0.15216
PhenoAge	ieu-a-1126	Breast cancer (Combined Oncoarray; iCOGS; GWAS meta analysis) || id:ieu-a-1126	PhenoAge acceleration	Weighted mode	11	-0.0189115	0.0175212	0.305776
PhenoAge	ieu-a-966	Lung cancer || id:ieu-a-966	PhenoAge acceleration	Inverse variance weighted	11	-0.037039	0.0200271	0.0643943
PhenoAge	ieu-a-966	Lung cancer || id:ieu-a-966	PhenoAge acceleration	MR Egger	11	0.0450875	0.0571811	0.450671
PhenoAge	ieu-a-966	Lung cancer || id:ieu-a-966	PhenoAge acceleration	Weighted median	11	-0.0131619	0.0272861	0.629545
PhenoAge	ieu-a-966	Lung cancer || id:ieu-a-966	PhenoAge acceleration	Weighted mode	11	0.0129932	0.0504379	0.801933
PhenoAge	ieu-b-85	Prostate cancer || id:ieu-b-85	PhenoAge acceleration	Inverse variance weighted	11	0.0037931	0.0109102	0.728091
PhenoAge	ieu-b-85	Prostate cancer || id:ieu-b-85	PhenoAge acceleration	MR Egger	11	-0.0154887	0.0327802	0.647816
PhenoAge	ieu-b-85	Prostate cancer || id:ieu-b-85	PhenoAge acceleration	Weighted median	11	-0.0019824	0.0120972	0.869831
PhenoAge	ieu-b-85	Prostate cancer || id:ieu-b-85	PhenoAge acceleration	Weighted mode	11	-0.00678485	0.0169165	0.696798
PhenoAge	XN1C5M	Colorectal cancer	PhenoAge acceleration	Inverse variance weighted	11	-0.0115502	0.0154205	0.453848
PhenoAge	XN1C5M	Colorectal cancer	PhenoAge acceleration	MR Egger	11	-0.065432	0.0430468	0.162827
PhenoAge	XN1C5M	Colorectal cancer	PhenoAge acceleration	Weighted median	11	-0.0174862	0.0138983	0.208334
PhenoAge	XN1C5M	Colorectal cancer	PhenoAge acceleration	Weighted mode	11	-0.0185198	0.0190162	0.353077

## Sheet: S4. MR Cancer (UKB)
Table 4. MR for genetically predicted epigenetic age acceleration and cancer (UK Biobank)
id.exposure	id.outcome	outcome	exposure	method	nsnp	b	se	pval
GrimAge	751QXd	lung cancer unadjusted	GrimAge acceleration	Inverse variance weighted	4	0.29731	0.177499	0.0939346
GrimAge	751QXd	lung cancer unadjusted	GrimAge acceleration	MR Egger	4	1.13981	3.5615	0.779281
GrimAge	751QXd	lung cancer unadjusted	GrimAge acceleration	Weighted median	4	0.206439	0.111868	0.064981
GrimAge	751QXd	lung cancer unadjusted	GrimAge acceleration	Weighted mode	4	0.150088	0.160612	0.418993
GrimAge	aZcUoR	breast cancer	GrimAge acceleration	Inverse variance weighted	4	0.00514773	0.0345261	0.881477
GrimAge	aZcUoR	breast cancer	GrimAge acceleration	MR Egger	4	-0.203347	0.574038	0.757022
GrimAge	aZcUoR	breast cancer	GrimAge acceleration	Weighted median	4	-0.00595557	0.0419132	0.887007
GrimAge	aZcUoR	breast cancer	GrimAge acceleration	Weighted mode	4	-0.0229912	0.0553105	0.705592
GrimAge	GQu5Ee	prostate cancer	GrimAge acceleration	Inverse variance weighted	4	-0.128513	0.0951529	0.176825
GrimAge	GQu5Ee	prostate cancer	GrimAge acceleration	MR Egger	4	-0.376473	1.92751	0.86319
GrimAge	GQu5Ee	prostate cancer	GrimAge acceleration	Weighted median	4	-0.0746141	0.059629	0.210823
GrimAge	GQu5Ee	prostate cancer	GrimAge acceleration	Weighted mode	4	-0.0545793	0.0610399	0.437121
GrimAge	GycqVs	ovarian cancer	GrimAge acceleration	Inverse variance weighted	4	0.201319	0.113354	0.0757288
GrimAge	GycqVs	ovarian cancer	GrimAge acceleration	MR Egger	4	0.217663	2.21402	0.930651
GrimAge	GycqVs	ovarian cancer	GrimAge acceleration	Weighted median	4	0.208635	0.139026	0.133438
GrimAge	GycqVs	ovarian cancer	GrimAge acceleration	Weighted mode	4	0.24815	0.199114	0.301116
GrimAge	J2M7ze	colorectal cancer	GrimAge acceleration	Inverse variance weighted	4	0.142813	0.0528152	0.00685063
GrimAge	J2M7ze	colorectal cancer	GrimAge acceleration	MR Egger	4	0.487846	0.931108	0.652593
GrimAge	J2M7ze	colorectal cancer	GrimAge acceleration	Weighted median	4	0.132894	0.0638036	0.0372634
GrimAge	J2M7ze	colorectal cancer	GrimAge acceleration	Weighted mode	4	0.126957	0.0925058	0.26354
GrimAge	vRkqiR	lung cancer	GrimAge acceleration	Inverse variance weighted	4	0.295741	0.176697	0.0941867
GrimAge	vRkqiR	lung cancer	GrimAge acceleration	MR Egger	4	1.19338	3.53818	0.76801
GrimAge	vRkqiR	lung cancer	GrimAge acceleration	Weighted median	4	0.205067	0.110488	0.0634527
GrimAge	vRkqiR	lung cancer	GrimAge acceleration	Weighted mode	4	0.148482	0.144265	0.37909
Hannum	751QXd	lung cancer unadjusted	HannumAge acceleration	Inverse variance weighted	9	-0.0193751	0.0435453	0.656362
Hannum	751QXd	lung cancer unadjusted	HannumAge acceleration	MR Egger	9	0.259035	0.162466	0.154878
Hannum	751QXd	lung cancer unadjusted	HannumAge acceleration	Weighted median	9	0.0185394	0.0592233	0.754248
Hannum	751QXd	lung cancer unadjusted	HannumAge acceleration	Weighted mode	9	0.0166722	0.0730088	0.825096
Hannum	aZcUoR	breast cancer	HannumAge acceleration	Inverse variance weighted	9	0.00879422	0.0212721	0.679302
Hannum	aZcUoR	breast cancer	HannumAge acceleration	MR Egger	9	0.0955492	0.0778489	0.259355
Hannum	aZcUoR	breast cancer	HannumAge acceleration	Weighted median	9	0.00236295	0.0268061	0.929758
Hannum	aZcUoR	breast cancer	HannumAge acceleration	Weighted mode	9	0.00767064	0.0446295	0.867805
Hannum	GQu5Ee	prostate cancer	HannumAge acceleration	Inverse variance weighted	9	-0.0400135	0.0408555	0.327388
Hannum	GQu5Ee	prostate cancer	HannumAge acceleration	MR Egger	9	0.014557	0.161323	0.930628
Hannum	GQu5Ee	prostate cancer	HannumAge acceleration	Weighted median	9	0.00970444	0.0340505	0.775643
Hannum	GQu5Ee	prostate cancer	HannumAge acceleration	Weighted mode	9	0.00650744	0.0375078	0.866572
Hannum	GycqVs	ovarian cancer	HannumAge acceleration	Inverse variance weighted	9	0.029697	0.0644748	0.645086
Hannum	GycqVs	ovarian cancer	HannumAge acceleration	MR Egger	9	-0.0480046	0.24088	0.847702
Hannum	GycqVs	ovarian cancer	HannumAge acceleration	Weighted median	9	0.0334754	0.0834262	0.68823
Hannum	GycqVs	ovarian cancer	HannumAge acceleration	Weighted mode	9	-0.0218757	0.107101	0.843257
Hannum	J2M7ze	colorectal cancer	HannumAge acceleration	Inverse variance weighted	9	-0.00178499	0.046539	0.969405
Hannum	J2M7ze	colorectal cancer	HannumAge acceleration	MR Egger	9	-0.122121	0.179526	0.518209
Hannum	J2M7ze	colorectal cancer	HannumAge acceleration	Weighted median	9	-0.0258716	0.0435717	0.552666
Hannum	J2M7ze	colorectal cancer	HannumAge acceleration	Weighted mode	9	-0.0449022	0.0521329	0.414141
Hannum	vRkqiR	lung cancer	HannumAge acceleration	Inverse variance weighted	9	-0.0212266	0.0435252	0.625773
Hannum	vRkqiR	lung cancer	HannumAge acceleration	MR Egger	9	0.253412	0.162391	0.162606
Hannum	vRkqiR	lung cancer	HannumAge acceleration	Weighted median	9	0.0163218	0.0593092	0.783164
Hannum	vRkqiR	lung cancer	HannumAge acceleration	Weighted mode	9	0.0136775	0.0715273	0.853116
IEAA	751QXd	lung cancer unadjusted	Intrinsic HorvathAge acceleration	Inverse variance weighted	24	-0.0501889	0.0269333	0.0623985
IEAA	751QXd	lung cancer unadjusted	Intrinsic HorvathAge acceleration	MR Egger	24	-0.115169	0.0701156	0.114691
IEAA	751QXd	lung cancer unadjusted	Intrinsic HorvathAge acceleration	Weighted median	24	-0.0497968	0.0362772	0.169854
IEAA	751QXd	lung cancer unadjusted	Intrinsic HorvathAge acceleration	Weighted mode	24	-0.0700799	0.0515448	0.18714
IEAA	aZcUoR	breast cancer	Intrinsic HorvathAge acceleration	Inverse variance weighted	24	-0.0109123	0.0110661	0.324086
IEAA	aZcUoR	breast cancer	Intrinsic HorvathAge acceleration	MR Egger	24	-0.029322	0.0287684	0.319166
IEAA	aZcUoR	breast cancer	Intrinsic HorvathAge acceleration	Weighted median	24	-0.00913432	0.0162632	0.574351
IEAA	aZcUoR	breast cancer	Intrinsic HorvathAge acceleration	Weighted mode	24	-0.0159757	0.0228879	0.492175
IEAA	GQu5Ee	prostate cancer	Intrinsic HorvathAge acceleration	Inverse variance weighted	24	0.00516604	0.0135689	0.703407
IEAA	GQu5Ee	prostate cancer	Intrinsic HorvathAge acceleration	MR Egger	24	0.0141158	0.0353835	0.693785
IEAA	GQu5Ee	prostate cancer	Intrinsic HorvathAge acceleration	Weighted median	24	0.000922216	0.0202597	0.963693
IEAA	GQu5Ee	prostate cancer	Intrinsic HorvathAge acceleration	Weighted mode	24	0.00230213	0.0275535	0.934136
IEAA	GycqVs	ovarian cancer	Intrinsic HorvathAge acceleration	Inverse variance weighted	24	0.0218978	0.0394227	0.578579
IEAA	GycqVs	ovarian cancer	Intrinsic HorvathAge acceleration	MR Egger	24	-0.0378166	0.10391	0.719379
IEAA	GycqVs	ovarian cancer	Intrinsic HorvathAge acceleration	Weighted median	24	-0.0412077	0.0528344	0.435425
IEAA	GycqVs	ovarian cancer	Intrinsic HorvathAge acceleration	Weighted mode	24	-0.0363843	0.0688712	0.602355
IEAA	J2M7ze	colorectal cancer	Intrinsic HorvathAge acceleration	Inverse variance weighted	24	0.00139738	0.0194001	0.942579
IEAA	J2M7ze	colorectal cancer	Intrinsic HorvathAge acceleration	MR Egger	24	-0.0362556	0.0509107	0.483862
IEAA	J2M7ze	colorectal cancer	Intrinsic HorvathAge acceleration	Weighted median	24	-0.0204967	0.0238777	0.390669
IEAA	J2M7ze	colorectal cancer	Intrinsic HorvathAge acceleration	Weighted mode	24	-0.0287238	0.0358706	0.431465
IEAA	vRkqiR	lung cancer	Intrinsic HorvathAge acceleration	Inverse variance weighted	24	-0.0493862	0.0268323	0.0656874
IEAA	vRkqiR	lung cancer	Intrinsic HorvathAge acceleration	MR Egger	24	-0.114793	0.0698193	0.114361
IEAA	vRkqiR	lung cancer	Intrinsic HorvathAge acceleration	Weighted median	24	-0.0526014	0.0357001	0.140637
IEAA	vRkqiR	lung cancer	Intrinsic HorvathAge acceleration	Weighted mode	24	-0.0695935	0.0515813	0.190406
PhenoAge	751QXd	lung cancer unadjusted	PhenoAge acceleration	Inverse variance weighted	11	-0.0420736	0.0300854	0.161971
PhenoAge	751QXd	lung cancer unadjusted	PhenoAge acceleration	MR Egger	11	-0.0165365	0.0855601	0.851036
PhenoAge	751QXd	lung cancer unadjusted	PhenoAge acceleration	Weighted median	11	-0.0628981	0.0398956	0.114895
PhenoAge	751QXd	lung cancer unadjusted	PhenoAge acceleration	Weighted mode	11	-0.068139	0.0605857	0.286999
PhenoAge	aZcUoR	breast cancer	PhenoAge acceleration	Inverse variance weighted	11	-0.0194214	0.0167032	0.244936
PhenoAge	aZcUoR	breast cancer	PhenoAge acceleration	MR Egger	11	-0.0409916	0.0494478	0.428549
PhenoAge	aZcUoR	breast cancer	PhenoAge acceleration	Weighted median	11	-0.00925264	0.0197968	0.640227
PhenoAge	aZcUoR	breast cancer	PhenoAge acceleration	Weighted mode	11	0.00261565	0.0278029	0.926905
PhenoAge	GQu5Ee	prostate cancer	PhenoAge acceleration	Inverse variance weighted	11	0.0420265	0.0230847	0.0686774
PhenoAge	GQu5Ee	prostate cancer	PhenoAge acceleration	MR Egger	11	0.076108	0.0681691	0.293144
PhenoAge	GQu5Ee	prostate cancer	PhenoAge acceleration	Weighted median	11	0.0287142	0.0239139	0.229856
PhenoAge	GQu5Ee	prostate cancer	PhenoAge acceleration	Weighted mode	11	0.0163084	0.0315426	0.616377
PhenoAge	GycqVs	ovarian cancer	PhenoAge acceleration	Inverse variance weighted	11	-0.00155842	0.04762	0.973893
PhenoAge	GycqVs	ovarian cancer	PhenoAge acceleration	MR Egger	11	0.0277825	0.142311	0.849553
PhenoAge	GycqVs	ovarian cancer	PhenoAge acceleration	Weighted median	11	-0.0100521	0.0623841	0.871989
PhenoAge	GycqVs	ovarian cancer	PhenoAge acceleration	Weighted mode	11	-0.0319241	0.0891601	0.727746
PhenoAge	J2M7ze	colorectal cancer	PhenoAge acceleration	Inverse variance weighted	11	0.00799758	0.0207484	0.6999
PhenoAge	J2M7ze	colorectal cancer	PhenoAge acceleration	MR Egger	11	-0.00694424	0.0590056	0.9089
PhenoAge	J2M7ze	colorectal cancer	PhenoAge acceleration	Weighted median	11	0.0196511	0.0284947	0.49042
PhenoAge	J2M7ze	colorectal cancer	PhenoAge acceleration	Weighted mode	11	0.0398267	0.0470613	0.417192
PhenoAge	vRkqiR	lung cancer	PhenoAge acceleration	Inverse variance weighted	11	-0.0423432	0.0300714	0.159105
PhenoAge	vRkqiR	lung cancer	PhenoAge acceleration	MR Egger	11	-0.0175901	0.0855203	0.841615
PhenoAge	vRkqiR	lung cancer	PhenoAge acceleration	Weighted median	11	-0.0610514	0.0386226	0.113943
PhenoAge	vRkqiR	lung cancer	PhenoAge acceleration	Weighted mode	11	-0.0696239	0.057581	0.254418
* We only included MR results obtained using the unadjusted lung cancer GWAS estimates in the meta-analysis (UKBiLEVE participants were genotyped using a different array, so using adjusted lung cancer estimates may introduce collider bias), but both unadjusted and adjusted MR results have been presented in Supplementary File 1—Table 4 to facilitate their comparison

## Sheet: S5. MR Cancer (FinnGen)
Table 5. MR for genetically predicted epigenetic age acceleration and cancer (FinnGen)
id.exposure	id.outcome	outcome	exposure	method	nsnp	b	se	pval
GrimAge	1vig3K	lung cancer (excluding cancer in controls)	GrimAge acceleration	Inverse variance weighted	4	0.0107461	0.0967242	0.911537
GrimAge	1vig3K	lung cancer (excluding cancer in controls)	GrimAge acceleration	MR Egger	4	1.0689	1.63248	0.579853
GrimAge	1vig3K	lung cancer (excluding cancer in controls)	GrimAge acceleration	Weighted median	4	0.0250595	0.111441	0.822082
GrimAge	1vig3K	lung cancer (excluding cancer in controls)	GrimAge acceleration	Weighted mode	4	0.0988848	0.171498	0.604631
GrimAge	6U7VBX	ovarian cancer (excluding cancer in controls)	GrimAge acceleration	Inverse variance weighted	4	0.0567684	0.145825	0.697061
GrimAge	6U7VBX	ovarian cancer (excluding cancer in controls)	GrimAge acceleration	MR Egger	4	-2.55909	2.45664	0.40693
GrimAge	6U7VBX	ovarian cancer (excluding cancer in controls)	GrimAge acceleration	Weighted median	4	0.0570536	0.162214	0.725049
GrimAge	6U7VBX	ovarian cancer (excluding cancer in controls)	GrimAge acceleration	Weighted mode	4	-0.0549105	0.228526	0.825595
GrimAge	8Rln7O	colorectal cancer (excluding cancer in controls)	GrimAge acceleration	Inverse variance weighted	4	0.0804836	0.0732496	0.271874
GrimAge	8Rln7O	colorectal cancer (excluding cancer in controls)	GrimAge acceleration	MR Egger	4	0.518391	1.25388	0.719406
GrimAge	8Rln7O	colorectal cancer (excluding cancer in controls)	GrimAge acceleration	Weighted median	4	0.117445	0.085551	0.169812
GrimAge	8Rln7O	colorectal cancer (excluding cancer in controls)	GrimAge acceleration	Weighted mode	4	0.153523	0.128327	0.317491
GrimAge	GLr33e	breast cancer (excluding cancer in controls)	GrimAge acceleration	Inverse variance weighted	4	0.0587703	0.0479196	0.220035
GrimAge	GLr33e	breast cancer (excluding cancer in controls)	GrimAge acceleration	MR Egger	4	0.808423	0.807607	0.422261
GrimAge	GLr33e	breast cancer (excluding cancer in controls)	GrimAge acceleration	Weighted median	4	0.0571874	0.0538174	0.287955
GrimAge	GLr33e	breast cancer (excluding cancer in controls)	GrimAge acceleration	Weighted mode	4	0.0586974	0.0743539	0.4875
GrimAge	yCslsz	prostate cancer (excluding cancer in controls)	GrimAge acceleration	Inverse variance weighted	4	-0.063563	0.0579024	0.272309
GrimAge	yCslsz	prostate cancer (excluding cancer in controls)	GrimAge acceleration	MR Egger	4	-0.924183	0.97815	0.444479
GrimAge	yCslsz	prostate cancer (excluding cancer in controls)	GrimAge acceleration	Weighted median	4	-0.0566461	0.0679856	0.404728
GrimAge	yCslsz	prostate cancer (excluding cancer in controls)	GrimAge acceleration	Weighted mode	4	-0.054891	0.0920129	0.592821
Hannum	1vig3K	lung cancer (excluding cancer in controls)	HannumAge acceleration	Inverse variance weighted	9	0.00820908	0.0609375	0.892839
Hannum	1vig3K	lung cancer (excluding cancer in controls)	HannumAge acceleration	MR Egger	9	-0.32176	0.230749	0.205847
Hannum	1vig3K	lung cancer (excluding cancer in controls)	HannumAge acceleration	Weighted median	9	0.0518566	0.0859522	0.546297
Hannum	1vig3K	lung cancer (excluding cancer in controls)	HannumAge acceleration	Weighted mode	9	0.0758418	0.147095	0.620078
Hannum	6U7VBX	ovarian cancer (excluding cancer in controls)	HannumAge acceleration	Inverse variance weighted	9	-0.149054	0.0916242	0.10378
Hannum	6U7VBX	ovarian cancer (excluding cancer in controls)	HannumAge acceleration	MR Egger	9	0.326274	0.347965	0.379633
Hannum	6U7VBX	ovarian cancer (excluding cancer in controls)	HannumAge acceleration	Weighted median	9	-0.122495	0.125552	0.329234
Hannum	6U7VBX	ovarian cancer (excluding cancer in controls)	HannumAge acceleration	Weighted mode	9	-0.114569	0.157578	0.487913
Hannum	8Rln7O	colorectal cancer (excluding cancer in controls)	HannumAge acceleration	Inverse variance weighted	9	0.0514143	0.0460238	0.263941
Hannum	8Rln7O	colorectal cancer (excluding cancer in controls)	HannumAge acceleration	MR Egger	9	0.003977	0.174953	0.982499
Hannum	8Rln7O	colorectal cancer (excluding cancer in controls)	HannumAge acceleration	Weighted median	9	0.0310834	0.0598247	0.60336
Hannum	8Rln7O	colorectal cancer (excluding cancer in controls)	HannumAge acceleration	Weighted mode	9	-0.00356145	0.0786526	0.964993
Hannum	GLr33e	breast cancer (excluding cancer in controls)	HannumAge acceleration	Inverse variance weighted	9	-0.0400054	0.0302064	0.18537
Hannum	GLr33e	breast cancer (excluding cancer in controls)	HannumAge acceleration	MR Egger	9	0.0754156	0.114919	0.532634
Hannum	GLr33e	breast cancer (excluding cancer in controls)	HannumAge acceleration	Weighted median	9	-0.0737	0.0419338	0.078827
Hannum	GLr33e	breast cancer (excluding cancer in controls)	HannumAge acceleration	Weighted mode	9	-0.0930341	0.0695518	0.217797
Hannum	yCslsz	prostate cancer (excluding cancer in controls)	HannumAge acceleration	Inverse variance weighted	9	0.00599817	0.0363839	0.869056
Hannum	yCslsz	prostate cancer (excluding cancer in controls)	HannumAge acceleration	MR Egger	9	0.114875	0.137955	0.432504
Hannum	yCslsz	prostate cancer (excluding cancer in controls)	HannumAge acceleration	Weighted median	9	0.0177186	0.0477256	0.710444
Hannum	yCslsz	prostate cancer (excluding cancer in controls)	HannumAge acceleration	Weighted mode	9	0.0218495	0.0687006	0.758599
IEAA	1vig3K	lung cancer (excluding cancer in controls)	Intrinsic HorvathAge acceleration	Inverse variance weighted	24	-0.0444776	0.0380421	0.242336
IEAA	1vig3K	lung cancer (excluding cancer in controls)	Intrinsic HorvathAge acceleration	MR Egger	24	-0.13346	0.0893615	0.149514
IEAA	1vig3K	lung cancer (excluding cancer in controls)	Intrinsic HorvathAge acceleration	Weighted median	24	-0.00153272	0.0489178	0.975004
IEAA	1vig3K	lung cancer (excluding cancer in controls)	Intrinsic HorvathAge acceleration	Weighted mode	24	0.0893942	0.117238	0.453512
IEAA	6U7VBX	ovarian cancer (excluding cancer in controls)	Intrinsic HorvathAge acceleration	Inverse variance weighted	24	-0.0555807	0.0492267	0.258865
IEAA	6U7VBX	ovarian cancer (excluding cancer in controls)	Intrinsic HorvathAge acceleration	MR Egger	24	-0.100495	0.118076	0.403878
IEAA	6U7VBX	ovarian cancer (excluding cancer in controls)	Intrinsic HorvathAge acceleration	Weighted median	24	-0.0906234	0.0691898	0.19027
IEAA	6U7VBX	ovarian cancer (excluding cancer in controls)	Intrinsic HorvathAge acceleration	Weighted mode	24	-0.0607605	0.0879394	0.49652
IEAA	8Rln7O	colorectal cancer (excluding cancer in controls)	Intrinsic HorvathAge acceleration	Inverse variance weighted	24	0.0262297	0.0261571	0.315969
IEAA	8Rln7O	colorectal cancer (excluding cancer in controls)	Intrinsic HorvathAge acceleration	MR Egger	24	0.024154	0.0632465	0.706198
IEAA	8Rln7O	colorectal cancer (excluding cancer in controls)	Intrinsic HorvathAge acceleration	Weighted median	24	0.0351221	0.0335818	0.295622
IEAA	8Rln7O	colorectal cancer (excluding cancer in controls)	Intrinsic HorvathAge acceleration	Weighted mode	24	0.0331057	0.0396671	0.412535
IEAA	GLr33e	breast cancer (excluding cancer in controls)	Intrinsic HorvathAge acceleration	Inverse variance weighted	24	-0.0119078	0.0166736	0.475123
IEAA	GLr33e	breast cancer (excluding cancer in controls)	Intrinsic HorvathAge acceleration	MR Egger	24	0.014064	0.0398397	0.727437
IEAA	GLr33e	breast cancer (excluding cancer in controls)	Intrinsic HorvathAge acceleration	Weighted median	24	-0.00858333	0.0228074	0.706664
IEAA	GLr33e	breast cancer (excluding cancer in controls)	Intrinsic HorvathAge acceleration	Weighted mode	24	-0.0082885	0.0268627	0.760441
IEAA	yCslsz	prostate cancer (excluding cancer in controls)	Intrinsic HorvathAge acceleration	Inverse variance weighted	24	-0.0498552	0.0232703	0.0321585
IEAA	yCslsz	prostate cancer (excluding cancer in controls)	Intrinsic HorvathAge acceleration	MR Egger	24	-0.0127246	0.055399	0.820455
IEAA	yCslsz	prostate cancer (excluding cancer in controls)	Intrinsic HorvathAge acceleration	Weighted median	24	-0.0416045	0.0288793	0.149688
IEAA	yCslsz	prostate cancer (excluding cancer in controls)	Intrinsic HorvathAge acceleration	Weighted mode	24	-0.0993164	0.0623912	0.125074
PhenoAge	1vig3K	lung cancer (excluding cancer in controls)	PhenoAge acceleration	Inverse variance weighted	11	0.024476	0.039251	0.532906
PhenoAge	1vig3K	lung cancer (excluding cancer in controls)	PhenoAge acceleration	MR Egger	11	0.0854245	0.12005	0.494757
PhenoAge	1vig3K	lung cancer (excluding cancer in controls)	PhenoAge acceleration	Weighted median	11	0.0367604	0.0493605	0.456434
PhenoAge	1vig3K	lung cancer (excluding cancer in controls)	PhenoAge acceleration	Weighted mode	11	0.0707822	0.0830419	0.413958
PhenoAge	6U7VBX	ovarian cancer (excluding cancer in controls)	PhenoAge acceleration	Inverse variance weighted	11	-0.0317802	0.0592047	0.591417
PhenoAge	6U7VBX	ovarian cancer (excluding cancer in controls)	PhenoAge acceleration	MR Egger	11	-0.0388816	0.188827	0.841443
PhenoAge	6U7VBX	ovarian cancer (excluding cancer in controls)	PhenoAge acceleration	Weighted median	11	0.0373864	0.0806886	0.643119
PhenoAge	6U7VBX	ovarian cancer (excluding cancer in controls)	PhenoAge acceleration	Weighted mode	11	0.0518417	0.13534	0.7097
PhenoAge	8Rln7O	colorectal cancer (excluding cancer in controls)	PhenoAge acceleration	Inverse variance weighted	11	0.0202981	0.029764	0.495259
PhenoAge	8Rln7O	colorectal cancer (excluding cancer in controls)	PhenoAge acceleration	MR Egger	11	0.0217274	0.0910733	0.816782
PhenoAge	8Rln7O	colorectal cancer (excluding cancer in controls)	PhenoAge acceleration	Weighted median	11	0.0147949	0.037663	0.69445
PhenoAge	8Rln7O	colorectal cancer (excluding cancer in controls)	PhenoAge acceleration	Weighted mode	11	0.0058302	0.0651359	0.930445
PhenoAge	GLr33e	breast cancer (excluding cancer in controls)	PhenoAge acceleration	Inverse variance weighted	11	-0.0044919	0.0195634	0.818397
PhenoAge	GLr33e	breast cancer (excluding cancer in controls)	PhenoAge acceleration	MR Egger	11	0.006839	0.0598275	0.9115
PhenoAge	GLr33e	breast cancer (excluding cancer in controls)	PhenoAge acceleration	Weighted median	11	0.00094547	0.025828	0.970799
PhenoAge	GLr33e	breast cancer (excluding cancer in controls)	PhenoAge acceleration	Weighted mode	11	-0.00102535	0.0377665	0.978875
PhenoAge	yCslsz	prostate cancer (excluding cancer in controls)	PhenoAge acceleration	Inverse variance weighted	11	0.000707074	0.0234831	0.975979
PhenoAge	yCslsz	prostate cancer (excluding cancer in controls)	PhenoAge acceleration	MR Egger	11	-0.0710056	0.0717122	0.347974
PhenoAge	yCslsz	prostate cancer (excluding cancer in controls)	PhenoAge acceleration	Weighted median	11	-0.00168441	0.0309136	0.956547
PhenoAge	yCslsz	prostate cancer (excluding cancer in controls)	PhenoAge acceleration	Weighted mode	11	-0.00024565	0.0455027	0.995799

## Sheet: S6. MR meta-analysis
Table 6. Fixed effect meta-analysis of MR for genetically predicted epigenetic age acceleration and cancer (Consortia, UK Biobank and FinnGen)
exposure	outcome	method	b	se	pval	p.fdr
GrimAge	Breast cancer	Weighted mode	-0.0360032	0.0237073	0.128849	NA
GrimAge	Ovarian cancer	Weighted mode	-0.000333317	0.0555011	0.995208	NA
GrimAge	Prostate cancer	Weighted mode	-0.0417492	0.0343874	0.224715	NA
GrimAge	Lung cancer	Weighted mode	0.0337528	0.0700501	0.629921	NA
GrimAge	Colorectal cancer	Weighted mode	0.111362	0.0483162	0.0211747	NA
GrimAge	Breast cancer	Weighted median	-0.0274507	0.0175923	0.11867	NA
GrimAge	Ovarian cancer	Weighted median	-0.00405978	0.041439	0.921956	NA
GrimAge	Prostate cancer	Weighted median	-0.0577569	0.0254552	0.0232705	NA
GrimAge	Lung cancer	Weighted median	0.0285082	0.0516731	0.581153	NA
GrimAge	Colorectal cancer	Weighted median	0.111622	0.0322363	0.000534942	NA
GrimAge	Breast cancer	MR Egger	-0.129358	0.244006	0.596013	NA
GrimAge	Ovarian cancer	MR Egger	-0.302501	0.570948	0.596235	NA
GrimAge	Prostate cancer	MR Egger	-0.352953	0.60794	0.561529	NA
GrimAge	Lung cancer	MR Egger	0.895312	0.759762	0.238633	NA
GrimAge	Colorectal cancer	MR Egger	0.760457	0.604367	0.208294	NA
GrimAge	Breast cancer	Inverse variance weighted	-0.0253178	0.0146489	0.083934	0.335736
GrimAge	Ovarian cancer	Inverse variance weighted	-0.00949854	0.0337843	0.778594	0.955684
GrimAge	Prostate cancer	Inverse variance weighted	-0.0771267	0.0318801	0.0155515	0.155515
GrimAge	Lung cancer	Inverse variance weighted	-0.00263761	0.0474643	0.955684	0.955684
GrimAge	Colorectal cancer	Inverse variance weighted	0.112693	0.0362563	0.00188221	0.0376443
PhenoAge	Breast cancer	Weighted mode	-0.0112216	0.0137984	0.416075	NA
PhenoAge	Ovarian cancer	Weighted mode	-0.00766839	0.0343618	0.823406	NA
PhenoAge	Prostate cancer	Weighted mode	-0.00149252	0.0141669	0.916096	NA
PhenoAge	Lung cancer	Weighted mode	-0.00393763	0.0351249	0.910741	NA
PhenoAge	Colorectal cancer	Weighted mode	-0.0166073	0.0182542	0.362936	NA
PhenoAge	Breast cancer	Weighted median	-0.0118628	0.00852106	0.16387	NA
PhenoAge	Ovarian cancer	Weighted median	-0.0108505	0.0194966	0.577845	NA
PhenoAge	Prostate cancer	Weighted median	0.00362486	0.0101912	0.722075	NA
PhenoAge	Lung cancer	Weighted median	-0.0176788	0.0204901	0.38825	NA
PhenoAge	Colorectal cancer	Weighted median	-0.0136173	0.0130388	0.296317	NA
PhenoAge	Breast cancer	MR Egger	0.0135526	0.0193733	0.484207	NA
PhenoAge	Ovarian cancer	MR Egger	0.0267158	0.0414274	0.519003	NA
PhenoAge	Prostate cancer	MR Egger	-0.00883674	0.0273151	0.746308	NA
PhenoAge	Lung cancer	MR Egger	0.034109	0.0442015	0.440309	NA
PhenoAge	Colorectal cancer	MR Egger	-0.0495157	0.0389184	0.203268	NA
PhenoAge	Breast cancer	Inverse variance weighted	-0.00823373	0.00687622	0.231143	0.603169
PhenoAge	Ovarian cancer	Inverse variance weighted	-0.0168658	0.0143928	0.241268	0.603169
PhenoAge	Prostate cancer	Inverse variance weighted	0.00926406	0.00909429	0.308361	0.685246
PhenoAge	Lung cancer	Inverse variance weighted	-0.0289474	0.0153445	0.0592272	0.296136
PhenoAge	Colorectal cancer	Inverse variance weighted	-0.00481052	0.013692	0.725335	0.955684
Hannum	Breast cancer	Weighted mode	0.0210596	0.014264	0.139831	NA
Hannum	Ovarian cancer	Weighted mode	-0.00170498	0.0458713	0.97035	NA
Hannum	Prostate cancer	Weighted mode	0.0143254	0.0165206	0.385873	NA
Hannum	Lung cancer	Weighted mode	0.0199145	0.0398139	0.616942	NA
Hannum	Colorectal cancer	Weighted mode	-0.0177294	0.01945	0.362014	NA
Hannum	Breast cancer	Weighted median	0.0111779	0.0125513	0.373155	NA
Hannum	Ovarian cancer	Weighted median	0.0109748	0.0260915	0.674026	NA
Hannum	Prostate cancer	Weighted median	0.00960456	0.0152808	0.52965	NA
Hannum	Lung cancer	Weighted median	0.0188704	0.0302051	0.53214	NA
Hannum	Colorectal cancer	Weighted median	-0.0103466	0.0192278	0.590504	NA
Hannum	Breast cancer	MR Egger	0.125316	0.0443989	0.00476501	NA
Hannum	Ovarian cancer	MR Egger	-0.0140994	0.075668	0.852184	NA
Hannum	Prostate cancer	MR Egger	0.0360785	0.0740903	0.626291	NA
Hannum	Lung cancer	MR Egger	0.0705086	0.0878228	0.422061	NA
Hannum	Colorectal cancer	MR Egger	0.0278355	0.102375	0.7857	NA
Hannum	Breast cancer	Inverse variance weighted	-0.00659259	0.0135965	0.627767	0.955684
Hannum	Ovarian cancer	Inverse variance weighted	-0.00115644	0.0199095	0.953681	0.955684
Hannum	Prostate cancer	Inverse variance weighted	-0.0161924	0.0187182	0.387005	0.703646
Hannum	Lung cancer	Inverse variance weighted	-0.00525515	0.0233808	0.822163	0.955684
Hannum	Colorectal cancer	Inverse variance weighted	0.0232572	0.025962	0.370351	0.703646
IEAA	Breast cancer	Weighted mode	-0.00360253	0.0105488	0.732719	NA
IEAA	Ovarian cancer	Weighted mode	0.00396237	0.0273064	0.884626	NA
IEAA	Prostate cancer	Weighted mode	-0.00527856	0.012825	0.680646	NA
IEAA	Lung cancer	Weighted mode	-0.00790527	0.030183	0.79339	NA
IEAA	Colorectal cancer	Weighted mode	-0.00647983	0.0159796	0.685105	NA
IEAA	Breast cancer	Weighted median	-0.0032254	0.00757228	0.670145	NA
IEAA	Ovarian cancer	Weighted median	0.0024005	0.0167405	0.885979	NA
IEAA	Prostate cancer	Weighted median	-0.00596547	0.00962056	0.535208	NA
IEAA	Lung cancer	Weighted median	-0.0121113	0.0192522	0.529293	NA
IEAA	Colorectal cancer	Weighted median	0.00197039	0.0112162	0.86055	NA
IEAA	Breast cancer	MR Egger	-0.0126113	0.0156919	0.421582	NA
IEAA	Ovarian cancer	MR Egger	0.0175123	0.0348215	0.615022	NA
IEAA	Prostate cancer	MR Egger	-0.00413368	0.0205357	0.84047	NA
IEAA	Lung cancer	MR Egger	-0.0875452	0.0421618	0.0378559	NA
IEAA	Colorectal cancer	MR Egger	-0.0155113	0.0306123	0.612365	NA
IEAA	Breast cancer	Inverse variance weighted	-0.00881802	0.00589305	0.134564	0.448548
IEAA	Ovarian cancer	Inverse variance weighted	-0.00184972	0.013244	0.888924	0.955684
IEAA	Prostate cancer	Inverse variance weighted	-0.00630811	0.00789393	0.424228	0.707046
IEAA	Lung cancer	Inverse variance weighted	-0.0355846	0.0165527	0.0315732	0.210488
IEAA	Colorectal cancer	Inverse variance weighted	-0.00309226	0.011387	0.785959	0.955684
* For colorectal cancer, the fixed effect meta-analysis only included GECCO and FinnGen
* Lung cancer meta-analysis included GECCO, FinnGen and unadjusted UK Biobank data
* FDR corrections considered a total of 20 independent statistical tests (5 cancers x 4 clocks = 20)

## Sheet: S7. MR Negative controls
Table 7. Mendelian randomization analyses for the genetically predicted effects of epigenetic clock acceleration on negative control outcomes
id.exposure	id.outcome	outcome	exposure	method	nsnp	b	se	pval
GrimAge	ukb-b-19560	Skin colour || id:ukb-b-19560	GrimAge acceleration	Inverse variance weighted	4	0.00154688	0.00334016	0.643282
GrimAge	ukb-b-19560	Skin colour || id:ukb-b-19560	GrimAge acceleration	MR Egger	4	-0.0317958	0.0554932	0.624498
GrimAge	ukb-b-19560	Skin colour || id:ukb-b-19560	GrimAge acceleration	Weighted median	4	0.0014442	0.00375093	0.700219
GrimAge	ukb-b-19560	Skin colour || id:ukb-b-19560	GrimAge acceleration	Weighted mode	4	0.00440494	0.00562657	0.490811
GrimAge	ukb-b-533	Ease of skin tanning || id:ukb-b-533	GrimAge acceleration	Inverse variance weighted	4	-0.014296	0.00741671	0.0539123
GrimAge	ukb-b-533	Ease of skin tanning || id:ukb-b-533	GrimAge acceleration	MR Egger	4	0.0084386	0.1501	0.960278
GrimAge	ukb-b-533	Ease of skin tanning || id:ukb-b-533	GrimAge acceleration	Weighted median	4	-0.012289	0.0068993	0.07488
GrimAge	ukb-b-533	Ease of skin tanning || id:ukb-b-533	GrimAge acceleration	Weighted mode	4	-0.00462834	0.0105555	0.690696
Hannum	ukb-b-19560	Skin colour || id:ukb-b-19560	HannumAge acceleration	Inverse variance weighted	9	0.000651009	0.0036059	0.856729
Hannum	ukb-b-19560	Skin colour || id:ukb-b-19560	HannumAge acceleration	MR Egger	9	0.00829454	0.0140125	0.572505
Hannum	ukb-b-19560	Skin colour || id:ukb-b-19560	HannumAge acceleration	Weighted median	9	0.00373862	0.00270126	0.166349
Hannum	ukb-b-19560	Skin colour || id:ukb-b-19560	HannumAge acceleration	Weighted mode	9	0.00394313	0.00296801	0.220644
Hannum	ukb-b-533	Ease of skin tanning || id:ukb-b-533	HannumAge acceleration	Inverse variance weighted	9	-0.00322074	0.00317219	0.30996
Hannum	ukb-b-533	Ease of skin tanning || id:ukb-b-533	HannumAge acceleration	MR Egger	9	-0.0170179	0.0117793	0.191765
Hannum	ukb-b-533	Ease of skin tanning || id:ukb-b-533	HannumAge acceleration	Weighted median	9	-0.00409825	0.0040589	0.312641
Hannum	ukb-b-533	Ease of skin tanning || id:ukb-b-533	HannumAge acceleration	Weighted mode	9	-0.00572766	0.00524426	0.306551
IEAA	ukb-b-19560	Skin colour || id:ukb-b-19560	Intrinsic HorvathAge acceleration	Inverse variance weighted	24	-0.00132174	0.0013113	0.313476
IEAA	ukb-b-19560	Skin colour || id:ukb-b-19560	Intrinsic HorvathAge acceleration	MR Egger	24	-0.00453368	0.00340807	0.197053
IEAA	ukb-b-19560	Skin colour || id:ukb-b-19560	Intrinsic HorvathAge acceleration	Weighted median	24	-0.00160826	0.00159498	0.313299
IEAA	ukb-b-19560	Skin colour || id:ukb-b-19560	Intrinsic HorvathAge acceleration	Weighted mode	24	-0.00168052	0.00213672	0.439606
IEAA	ukb-b-533	Ease of skin tanning || id:ukb-b-533	Intrinsic HorvathAge acceleration	Inverse variance weighted	24	0.0039039	0.0027387	0.154024
IEAA	ukb-b-533	Ease of skin tanning || id:ukb-b-533	Intrinsic HorvathAge acceleration	MR Egger	24	0.0075008	0.00722635	0.310555
IEAA	ukb-b-533	Ease of skin tanning || id:ukb-b-533	Intrinsic HorvathAge acceleration	Weighted median	24	0.00157461	0.00295543	0.594182
IEAA	ukb-b-533	Ease of skin tanning || id:ukb-b-533	Intrinsic HorvathAge acceleration	Weighted mode	24	-0.00046932	0.0040544	0.908851
PhenoAge	ukb-b-19560	Skin colour || id:ukb-b-19560	PhenoAge acceleration	Inverse variance weighted	11	-0.0022376	0.00148794	0.132626
PhenoAge	ukb-b-19560	Skin colour || id:ukb-b-19560	PhenoAge acceleration	MR Egger	11	-0.00363166	0.0044292	0.43343
PhenoAge	ukb-b-19560	Skin colour || id:ukb-b-19560	PhenoAge acceleration	Weighted median	11	-0.00263555	0.00179711	0.142499
PhenoAge	ukb-b-19560	Skin colour || id:ukb-b-19560	PhenoAge acceleration	Weighted mode	11	-0.00263893	0.00250233	0.316427
PhenoAge	ukb-b-533	Ease of skin tanning || id:ukb-b-533	PhenoAge acceleration	Inverse variance weighted	11	0.003243	0.00219506	0.139567
PhenoAge	ukb-b-533	Ease of skin tanning || id:ukb-b-533	PhenoAge acceleration	MR Egger	11	0.00408318	0.00623325	0.528812
PhenoAge	ukb-b-533	Ease of skin tanning || id:ukb-b-533	PhenoAge acceleration	Weighted median	11	0.0037031	0.00280581	0.186903
PhenoAge	ukb-b-533	Ease of skin tanning || id:ukb-b-533	PhenoAge acceleration	Weighted mode	11	0.00419421	0.00393922	0.312032

## Sheet: S8. MR Potential confounders
Table 8. Mendelian randomization analyses for the genetically predicted effects of epigenetic clock acceleration on potential confounders of the association between epigenetic age acceleration and cancer
id.exposure	id.outcome	outcome	exposure	method	nsnp	b	se	pval
GrimAge	ieu-a-1239	Years of schooling || id:ieu-a-1239	GrimAge acceleration	Inverse variance weighted	3	0.0170573	0.0144996	0.239436
GrimAge	ieu-a-1239	Years of schooling || id:ieu-a-1239	GrimAge acceleration	MR Egger	3	0.253303	0.208371	0.438236
GrimAge	ieu-a-1239	Years of schooling || id:ieu-a-1239	GrimAge acceleration	Weighted median	3	0.010596	0.00961881	0.270639
GrimAge	ieu-a-1239	Years of schooling || id:ieu-a-1239	GrimAge acceleration	Weighted mode	3	0.00586861	0.0135089	0.706358
GrimAge	ieu-a-61	Waist circumference || id:ieu-a-61	GrimAge acceleration	Inverse variance weighted	4	-0.0108024	0.0186344	0.562116
GrimAge	ieu-a-61	Waist circumference || id:ieu-a-61	GrimAge acceleration	MR Egger	4	0.0244339	0.380965	0.954695
GrimAge	ieu-a-61	Waist circumference || id:ieu-a-61	GrimAge acceleration	Weighted median	4	-0.0160048	0.0148763	0.281991
GrimAge	ieu-a-61	Waist circumference || id:ieu-a-61	GrimAge acceleration	Weighted mode	4	-0.0323024	0.0299278	0.359476
GrimAge	ieu-a-835	Body mass index || id:ieu-a-835	GrimAge acceleration	Inverse variance weighted	4	-0.00629034	0.0191683	0.742787
GrimAge	ieu-a-835	Body mass index || id:ieu-a-835	GrimAge acceleration	MR Egger	4	0.146513	0.375042	0.733735
GrimAge	ieu-a-835	Body mass index || id:ieu-a-835	GrimAge acceleration	Weighted median	4	-0.023469	0.0135343	0.0829106
GrimAge	ieu-a-835	Body mass index || id:ieu-a-835	GrimAge acceleration	Weighted mode	4	-0.0300339	0.0151996	0.142616
GrimAge	ukb-b-10831	Pack years of smoking || id:ukb-b-10831	GrimAge acceleration	Inverse variance weighted	4	0.002348	0.00986173	0.81181
GrimAge	ukb-b-10831	Pack years of smoking || id:ukb-b-10831	GrimAge acceleration	MR Egger	4	-0.0274221	0.199503	0.903262
GrimAge	ukb-b-10831	Pack years of smoking || id:ukb-b-10831	GrimAge acceleration	Weighted median	4	0.0048664	0.0109063	0.655452
GrimAge	ukb-b-10831	Pack years of smoking || id:ukb-b-10831	GrimAge acceleration	Weighted mode	4	0.0128698	0.0188092	0.542948
GrimAge	ukb-b-13702	Time spent doing vigorous physical activity || id:ukb-b-13702	GrimAge acceleration	Inverse variance weighted	4	-0.0210396	0.0336331	0.531601
GrimAge	ukb-b-13702	Time spent doing vigorous physical activity || id:ukb-b-13702	GrimAge acceleration	MR Egger	4	-0.506657	0.591463	0.481911
GrimAge	ukb-b-13702	Time spent doing vigorous physical activity || id:ukb-b-13702	GrimAge acceleration	Weighted median	4	-0.0365206	0.0275498	0.184966
GrimAge	ukb-b-13702	Time spent doing vigorous physical activity || id:ukb-b-13702	GrimAge acceleration	Weighted mode	4	-0.0428258	0.0301997	0.251193
GrimAge	ukb-b-5779	Alcohol intake frequency. || id:ukb-b-5779	GrimAge acceleration	Inverse variance weighted	4	-0.00819442	0.0134654	0.54282
GrimAge	ukb-b-5779	Alcohol intake frequency. || id:ukb-b-5779	GrimAge acceleration	MR Egger	4	-0.340754	0.140188	0.135651
GrimAge	ukb-b-5779	Alcohol intake frequency. || id:ukb-b-5779	GrimAge acceleration	Weighted median	4	-0.00313236	0.0107504	0.770768
GrimAge	ukb-b-5779	Alcohol intake frequency. || id:ukb-b-5779	GrimAge acceleration	Weighted mode	4	0.00861513	0.020056	0.696503
GrimAge	ukb-b-6134	Age completed full time education || id:ukb-b-6134	GrimAge acceleration	Inverse variance weighted	4	-0.000758967	0.00718063	0.915823
GrimAge	ukb-b-6134	Age completed full time education || id:ukb-b-6134	GrimAge acceleration	MR Egger	4	0.0978125	0.128351	0.525626
GrimAge	ukb-b-6134	Age completed full time education || id:ukb-b-6134	GrimAge acceleration	Weighted median	4	0.000266596	0.0071012	0.970053
GrimAge	ukb-b-6134	Age completed full time education || id:ukb-b-6134	GrimAge acceleration	Weighted mode	4	0.00614084	0.0110635	0.617559
Hannum	ieu-a-1239	Years of schooling || id:ieu-a-1239	HannumAge acceleration	Inverse variance weighted	8	0.00138861	0.00818616	0.865302
Hannum	ieu-a-1239	Years of schooling || id:ieu-a-1239	HannumAge acceleration	MR Egger	8	0.0137189	0.0313651	0.67713
Hannum	ieu-a-1239	Years of schooling || id:ieu-a-1239	HannumAge acceleration	Weighted median	8	0.00194262	0.00389818	0.618244
Hannum	ieu-a-1239	Years of schooling || id:ieu-a-1239	HannumAge acceleration	Weighted mode	8	0.0029282	0.00410667	0.498898
Hannum	ieu-a-61	Waist circumference || id:ieu-a-61	HannumAge acceleration	Inverse variance weighted	7	-0.0038074	0.0076614	0.619218
Hannum	ieu-a-61	Waist circumference || id:ieu-a-61	HannumAge acceleration	MR Egger	7	-0.0101199	0.0347558	0.782611
Hannum	ieu-a-61	Waist circumference || id:ieu-a-61	HannumAge acceleration	Weighted median	7	-0.00509622	0.0101974	0.617247
Hannum	ieu-a-61	Waist circumference || id:ieu-a-61	HannumAge acceleration	Weighted mode	7	-0.00403851	0.0130021	0.766608
Hannum	ieu-a-835	Body mass index || id:ieu-a-835	HannumAge acceleration	Inverse variance weighted	7	-0.00125285	0.00728944	0.863538
Hannum	ieu-a-835	Body mass index || id:ieu-a-835	HannumAge acceleration	MR Egger	7	-0.056706	0.0278788	0.0976099
Hannum	ieu-a-835	Body mass index || id:ieu-a-835	HannumAge acceleration	Weighted median	7	-0.00932733	0.0091142	0.306126
Hannum	ieu-a-835	Body mass index || id:ieu-a-835	HannumAge acceleration	Weighted mode	7	-0.0114863	0.0105493	0.318022
Hannum	ukb-b-10831	Pack years of smoking || id:ukb-b-10831	HannumAge acceleration	Inverse variance weighted	9	-0.00480644	0.006307	0.446013
Hannum	ukb-b-10831	Pack years of smoking || id:ukb-b-10831	HannumAge acceleration	MR Egger	9	0.0144702	0.0239109	0.564161
Hannum	ukb-b-10831	Pack years of smoking || id:ukb-b-10831	HannumAge acceleration	Weighted median	9	-0.00117044	0.00764253	0.878281
Hannum	ukb-b-10831	Pack years of smoking || id:ukb-b-10831	HannumAge acceleration	Weighted mode	9	0.0089539	0.0103411	0.411781
Hannum	ukb-b-13702	Time spent doing vigorous physical activity || id:ukb-b-13702	HannumAge acceleration	Inverse variance weighted	9	-0.0036241	0.0137723	0.79244
Hannum	ukb-b-13702	Time spent doing vigorous physical activity || id:ukb-b-13702	HannumAge acceleration	MR Egger	9	0.0135604	0.0544515	0.810482
Hannum	ukb-b-13702	Time spent doing vigorous physical activity || id:ukb-b-13702	HannumAge acceleration	Weighted median	9	0.005952	0.0163868	0.716442
Hannum	ukb-b-13702	Time spent doing vigorous physical activity || id:ukb-b-13702	HannumAge acceleration	Weighted mode	9	0.00575967	0.0199442	0.780084
Hannum	ukb-b-5779	Alcohol intake frequency. || id:ukb-b-5779	HannumAge acceleration	Inverse variance weighted	9	-0.00425968	0.01022	0.676827
Hannum	ukb-b-5779	Alcohol intake frequency. || id:ukb-b-5779	HannumAge acceleration	MR Egger	9	-0.0290333	0.0395539	0.48679
Hannum	ukb-b-5779	Alcohol intake frequency. || id:ukb-b-5779	HannumAge acceleration	Weighted median	9	-0.00634949	0.00687367	0.355621
Hannum	ukb-b-5779	Alcohol intake frequency. || id:ukb-b-5779	HannumAge acceleration	Weighted mode	9	-0.00908726	0.00721772	0.243516
Hannum	ukb-b-6134	Age completed full time education || id:ukb-b-6134	HannumAge acceleration	Inverse variance weighted	9	0.00219805	0.00397857	0.580624
Hannum	ukb-b-6134	Age completed full time education || id:ukb-b-6134	HannumAge acceleration	MR Egger	9	0.0249938	0.0130915	0.0978784
Hannum	ukb-b-6134	Age completed full time education || id:ukb-b-6134	HannumAge acceleration	Weighted median	9	0.00662336	0.00449712	0.140805
Hannum	ukb-b-6134	Age completed full time education || id:ukb-b-6134	HannumAge acceleration	Weighted mode	9	0.00936095	0.0056415	0.135638
IEAA	ieu-a-1239	Years of schooling || id:ieu-a-1239	Intrinsic HorvathAge acceleration	Inverse variance weighted	24	0.00178064	0.00360613	0.621461
IEAA	ieu-a-1239	Years of schooling || id:ieu-a-1239	Intrinsic HorvathAge acceleration	MR Egger	24	0.00776136	0.00945964	0.420749
IEAA	ieu-a-1239	Years of schooling || id:ieu-a-1239	Intrinsic HorvathAge acceleration	Weighted median	24	0.00148506	0.00251846	0.555413
IEAA	ieu-a-1239	Years of schooling || id:ieu-a-1239	Intrinsic HorvathAge acceleration	Weighted mode	24	3.11037e-06	0.00285197	0.999139
IEAA	ieu-a-61	Waist circumference || id:ieu-a-61	Intrinsic HorvathAge acceleration	Inverse variance weighted	15	0.00774296	0.00505436	0.125538
IEAA	ieu-a-61	Waist circumference || id:ieu-a-61	Intrinsic HorvathAge acceleration	MR Egger	15	0.00523722	0.0149834	0.732285
IEAA	ieu-a-61	Waist circumference || id:ieu-a-61	Intrinsic HorvathAge acceleration	Weighted median	15	0.00798778	0.0064789	0.217617
IEAA	ieu-a-61	Waist circumference || id:ieu-a-61	Intrinsic HorvathAge acceleration	Weighted mode	15	0.0102847	0.00956096	0.300253
IEAA	ieu-a-835	Body mass index || id:ieu-a-835	Intrinsic HorvathAge acceleration	Inverse variance weighted	15	0.00438967	0.00525863	0.403855
IEAA	ieu-a-835	Body mass index || id:ieu-a-835	Intrinsic HorvathAge acceleration	MR Egger	15	0.00501095	0.0149778	0.743294
IEAA	ieu-a-835	Body mass index || id:ieu-a-835	Intrinsic HorvathAge acceleration	Weighted median	15	0.00238661	0.00617181	0.698981
IEAA	ieu-a-835	Body mass index || id:ieu-a-835	Intrinsic HorvathAge acceleration	Weighted mode	15	0.000303634	0.00816778	0.970871
IEAA	ukb-b-10831	Pack years of smoking || id:ukb-b-10831	Intrinsic HorvathAge acceleration	Inverse variance weighted	24	-0.00489228	0.00359499	0.173557
IEAA	ukb-b-10831	Pack years of smoking || id:ukb-b-10831	Intrinsic HorvathAge acceleration	MR Egger	24	-0.00194814	0.00953953	0.840061
IEAA	ukb-b-10831	Pack years of smoking || id:ukb-b-10831	Intrinsic HorvathAge acceleration	Weighted median	24	-0.00135569	0.00475368	0.775501
IEAA	ukb-b-10831	Pack years of smoking || id:ukb-b-10831	Intrinsic HorvathAge acceleration	Weighted mode	24	-0.00162339	0.00664775	0.80924
IEAA	ukb-b-13702	Time spent doing vigorous physical activity || id:ukb-b-13702	Intrinsic HorvathAge acceleration	Inverse variance weighted	24	-0.00633793	0.00688321	0.357164
IEAA	ukb-b-13702	Time spent doing vigorous physical activity || id:ukb-b-13702	Intrinsic HorvathAge acceleration	MR Egger	24	-0.0196818	0.0179215	0.283982
IEAA	ukb-b-13702	Time spent doing vigorous physical activity || id:ukb-b-13702	Intrinsic HorvathAge acceleration	Weighted median	24	-0.011037	0.00945586	0.243126
IEAA	ukb-b-13702	Time spent doing vigorous physical activity || id:ukb-b-13702	Intrinsic HorvathAge acceleration	Weighted mode	24	-0.0141354	0.0142241	0.33068
IEAA	ukb-b-5779	Alcohol intake frequency. || id:ukb-b-5779	Intrinsic HorvathAge acceleration	Inverse variance weighted	24	0.00369493	0.00373935	0.323093
IEAA	ukb-b-5779	Alcohol intake frequency. || id:ukb-b-5779	Intrinsic HorvathAge acceleration	MR Egger	24	0.0073171	0.00991341	0.468254
IEAA	ukb-b-5779	Alcohol intake frequency. || id:ukb-b-5779	Intrinsic HorvathAge acceleration	Weighted median	24	0.00296907	0.00398781	0.456552
IEAA	ukb-b-5779	Alcohol intake frequency. || id:ukb-b-5779	Intrinsic HorvathAge acceleration	Weighted mode	24	0.00464217	0.00534722	0.394282
IEAA	ukb-b-6134	Age completed full time education || id:ukb-b-6134	Intrinsic HorvathAge acceleration	Inverse variance weighted	24	0.00366198	0.00255951	0.152506
IEAA	ukb-b-6134	Age completed full time education || id:ukb-b-6134	Intrinsic HorvathAge acceleration	MR Egger	24	0.009812	0.00666235	0.154981
IEAA	ukb-b-6134	Age completed full time education || id:ukb-b-6134	Intrinsic HorvathAge acceleration	Weighted median	24	0.00605699	0.00290431	0.0370225
IEAA	ukb-b-6134	Age completed full time education || id:ukb-b-6134	Intrinsic HorvathAge acceleration	Weighted mode	24	0.00592048	0.00397891	0.150343
PhenoAge	ieu-a-1239	Years of schooling || id:ieu-a-1239	PhenoAge acceleration	Inverse variance weighted	11	-0.000722605	0.0043549	0.868213
PhenoAge	ieu-a-1239	Years of schooling || id:ieu-a-1239	PhenoAge acceleration	MR Egger	11	0.00264193	0.0130444	0.844004
PhenoAge	ieu-a-1239	Years of schooling || id:ieu-a-1239	PhenoAge acceleration	Weighted median	11	-0.00243423	0.00276087	0.377944
PhenoAge	ieu-a-1239	Years of schooling || id:ieu-a-1239	PhenoAge acceleration	Weighted mode	11	-0.00352975	0.00382204	0.37748
PhenoAge	ieu-a-61	Waist circumference || id:ieu-a-61	PhenoAge acceleration	Inverse variance weighted	9	0.00445844	0.00519524	0.390794
PhenoAge	ieu-a-61	Waist circumference || id:ieu-a-61	PhenoAge acceleration	MR Egger	9	0.00949521	0.0149666	0.54597
PhenoAge	ieu-a-61	Waist circumference || id:ieu-a-61	PhenoAge acceleration	Weighted median	9	0.00855797	0.0073134	0.241929
PhenoAge	ieu-a-61	Waist circumference || id:ieu-a-61	PhenoAge acceleration	Weighted mode	9	0.0133035	0.0117648	0.290904
PhenoAge	ieu-a-835	Body mass index || id:ieu-a-835	PhenoAge acceleration	Inverse variance weighted	9	0.00453047	0.00661188	0.493217
PhenoAge	ieu-a-835	Body mass index || id:ieu-a-835	PhenoAge acceleration	MR Egger	9	0.0173547	0.0195031	0.403096
PhenoAge	ieu-a-835	Body mass index || id:ieu-a-835	PhenoAge acceleration	Weighted median	9	0.00732784	0.00667672	0.272413
PhenoAge	ieu-a-835	Body mass index || id:ieu-a-835	PhenoAge acceleration	Weighted mode	9	0.0120399	0.0109242	0.302457
PhenoAge	ukb-b-10831	Pack years of smoking || id:ukb-b-10831	PhenoAge acceleration	Inverse variance weighted	11	-0.00100865	0.00419515	0.809995
PhenoAge	ukb-b-10831	Pack years of smoking || id:ukb-b-10831	PhenoAge acceleration	MR Egger	11	0.0203385	0.010813	0.0926679
PhenoAge	ukb-b-10831	Pack years of smoking || id:ukb-b-10831	PhenoAge acceleration	Weighted median	11	0.00360669	0.00532134	0.497912
PhenoAge	ukb-b-10831	Pack years of smoking || id:ukb-b-10831	PhenoAge acceleration	Weighted mode	11	0.00546477	0.00821972	0.521191
PhenoAge	ukb-b-13702	Time spent doing vigorous physical activity || id:ukb-b-13702	PhenoAge acceleration	Inverse variance weighted	11	-0.00435505	0.00946684	0.645493
PhenoAge	ukb-b-13702	Time spent doing vigorous physical activity || id:ukb-b-13702	PhenoAge acceleration	MR Egger	11	-0.000525728	0.0283363	0.985602
PhenoAge	ukb-b-13702	Time spent doing vigorous physical activity || id:ukb-b-13702	PhenoAge acceleration	Weighted median	11	-0.0009036	0.0120992	0.940467
PhenoAge	ukb-b-13702	Time spent doing vigorous physical activity || id:ukb-b-13702	PhenoAge acceleration	Weighted mode	11	0.0130049	0.0188599	0.506161
PhenoAge	ukb-b-5779	Alcohol intake frequency. || id:ukb-b-5779	PhenoAge acceleration	Inverse variance weighted	11	0.00191211	0.00668305	0.774791
PhenoAge	ukb-b-5779	Alcohol intake frequency. || id:ukb-b-5779	PhenoAge acceleration	MR Egger	11	0.0166142	0.0193276	0.412316
PhenoAge	ukb-b-5779	Alcohol intake frequency. || id:ukb-b-5779	PhenoAge acceleration	Weighted median	11	0.00555149	0.00468875	0.236412
PhenoAge	ukb-b-5779	Alcohol intake frequency. || id:ukb-b-5779	PhenoAge acceleration	Weighted mode	11	0.00996461	0.00678984	0.172954
PhenoAge	ukb-b-6134	Age completed full time education || id:ukb-b-6134	PhenoAge acceleration	Inverse variance weighted	11	-0.000770958	0.00245455	0.75345
PhenoAge	ukb-b-6134	Age completed full time education || id:ukb-b-6134	PhenoAge acceleration	MR Egger	11	0.0031204	0.00722008	0.675778
PhenoAge	ukb-b-6134	Age completed full time education || id:ukb-b-6134	PhenoAge acceleration	Weighted median	11	0.000491413	0.00337162	0.884119
PhenoAge	ukb-b-6134	Age completed full time education || id:ukb-b-6134	PhenoAge acceleration	Weighted mode	11	-0.00489673	0.00572249	0.412198

## Sheet: S9. Single SNP Analysis
Table 9. Single SNP analyses for the genetically predicted effects of epigenetic clock acceleration on multiple cancers
exposure	outcome	samplesize	SNP	b	se	pval
GrimAge acceleration	Breast cancer	549075	rs17094148	-0.0311111	0.0322222	0.334286
GrimAge acceleration	Breast cancer	549075	rs4065321	-0.0129184	0.0311216	0.678073
GrimAge acceleration	Breast cancer	549075	rs887466	-0.0145228	0.028527	0.610689
GrimAge acceleration	Breast cancer	549075	rs9386796	-0.0398386	0.0267272	0.136075
GrimAge acceleration	Breast cancer	549075	All - Inverse variance weighted	-0.0252832	0.0147054	0.0855562
GrimAge acceleration	Breast cancer	549075	All - MR Egger	-0.131873	0.244572	0.643743
HannumAge acceleration	Breast cancer	549075	rs1005277	0.0479042	0.0196274	0.0146597
HannumAge acceleration	Breast cancer	549075	rs10786282	0.0322222	0.0186111	0.0833906
HannumAge acceleration	Breast cancer	549075	rs111731678	-0.0176523	0.0317741	0.578515
HannumAge acceleration	Breast cancer	549075	rs12417758	-0.113712	0.0262781	1.50967e-05
HannumAge acceleration	Breast cancer	549075	rs1598856	-0.0247578	0.0285253	0.385436
HannumAge acceleration	Breast cancer	549075	rs3093956	-0.0959638	0.0317133	0.00247834
HannumAge acceleration	Breast cancer	549075	rs34970912	0.0429695	0.0326108	0.187622
HannumAge acceleration	Breast cancer	549075	rs4383328	-0.0402329	0.0312335	0.197699
HannumAge acceleration	Breast cancer	549075	rs4838595	0.0170807	0.0318323	0.591554
HannumAge acceleration	Breast cancer	549075	All - Inverse variance weighted	-0.0056961	0.0198193	0.773804
HannumAge acceleration	Breast cancer	549075	All - MR Egger	0.13932	0.0566056	0.0433867
Intrinsic HorvathAge acceleration	Breast cancer	549075	rs10447389	-0.0224313	0.0217077	0.301448
Intrinsic HorvathAge acceleration	Breast cancer	549075	rs10732882	-0.0557173	0.0232848	0.0167177
Intrinsic HorvathAge acceleration	Breast cancer	549075	rs10735418	0.0598772	0.0542477	0.269691
Intrinsic HorvathAge acceleration	Breast cancer	549075	rs10949481	-0.00341865	0.0127506	0.78861
Intrinsic HorvathAge acceleration	Breast cancer	549075	rs12043492	0.00277008	0.0249307	0.911528
Intrinsic HorvathAge acceleration	Breast cancer	549075	rs12666349	0.0204082	0.0313972	0.515692
Intrinsic HorvathAge acceleration	Breast cancer	549075	rs12903325	0.00812274	0.0279783	0.771569
Intrinsic HorvathAge acceleration	Breast cancer	549075	rs144317085	-0.00992991	0.0274533	0.717575
Intrinsic HorvathAge acceleration	Breast cancer	549075	rs1488106	0.0350301	0.030104	0.244571
Intrinsic HorvathAge acceleration	Breast cancer	549075	rs1511762	-0.000378501	0.0246026	0.987725
Intrinsic HorvathAge acceleration	Breast cancer	549075	rs1726672	-0.0338567	0.0294406	0.250144
Intrinsic HorvathAge acceleration	Breast cancer	549075	rs2275558	-0.0638116	0.033833	0.0592847
Intrinsic HorvathAge acceleration	Breast cancer	549075	rs2492286	-0.0349003	0.0281339	0.214788
Intrinsic HorvathAge acceleration	Breast cancer	549075	rs2736099	-0.094583	0.0240757	8.5452e-05
Intrinsic HorvathAge acceleration	Breast cancer	549075	rs34003787	0.00833591	0.0311825	0.789218
Intrinsic HorvathAge acceleration	Breast cancer	549075	rs3917672	0.00381388	0.0202136	0.850344
Intrinsic HorvathAge acceleration	Breast cancer	549075	rs4240228	-0.0294464	0.0231645	0.203662
Intrinsic HorvathAge acceleration	Breast cancer	549075	rs57941717	0.0316369	0.0216644	0.144203
Intrinsic HorvathAge acceleration	Breast cancer	549075	rs6414374	0.0323584	0.0252022	0.199159
Intrinsic HorvathAge acceleration	Breast cancer	549075	rs6577536	0.0289634	0.027439	0.291171
Intrinsic HorvathAge acceleration	Breast cancer	549075	rs75243280	0.00602669	0.0258287	0.815503
Intrinsic HorvathAge acceleration	Breast cancer	549075	rs7550821	0.0313603	0.0243042	0.196939
Intrinsic HorvathAge acceleration	Breast cancer	549075	rs7627756	-0.0259019	0.0245143	0.290692
Intrinsic HorvathAge acceleration	Breast cancer	549075	rs79111787	-0.0395549	0.0208242	0.0575026
Intrinsic HorvathAge acceleration	Breast cancer	549075	All - Inverse variance weighted	-0.0084183	0.00668219	0.207737
Intrinsic HorvathAge acceleration	Breast cancer	549075	All - MR Egger	-0.0115327	0.0180464	0.529382
PhenoAge acceleration	Breast cancer	549075	rs11190127	-0.0120773	0.0221417	0.585441
PhenoAge acceleration	Breast cancer	549075	rs11253338	-0.0274069	0.0245959	0.265157
PhenoAge acceleration	Breast cancer	549075	rs1142345	-0.00327869	0.0168792	0.845984
PhenoAge acceleration	Breast cancer	549075	rs116853700	-0.0355266	0.0242886	0.143553
PhenoAge acceleration	Breast cancer	549075	rs1990053	-0.0151574	0.0205985	0.461823
PhenoAge acceleration	Breast cancer	549075	rs3829957	0.0297682	0.0173867	0.0868743
PhenoAge acceleration	Breast cancer	549075	rs6531114	-0.0424862	0.0236035	0.0718606
PhenoAge acceleration	Breast cancer	549075	rs678553	-0.0168453	0.0183767	0.359317
PhenoAge acceleration	Breast cancer	549075	rs7228835	-0.00835925	0.0161353	0.604408
PhenoAge acceleration	Breast cancer	549075	rs73028070	-0.027951	0.024255	0.249165
PhenoAge acceleration	Breast cancer	549075	rs752223	0.0132096	0.0178508	0.4593
PhenoAge acceleration	Breast cancer	549075	All - Inverse variance weighted	-0.00868727	0.00635311	0.171499
PhenoAge acceleration	Breast cancer	549075	All - MR Egger	0.0103193	0.0183257	0.587115
GrimAge acceleration	Colorectal cancer	302506	rs17094148	0.110556	0.0505556	0.0287562
GrimAge acceleration	Colorectal cancer	302506	rs4065321	0.0322959	0.0493247	0.512621
GrimAge acceleration	Colorectal cancer	302506	rs887466	0.206432	0.0440871	2.83601e-06
GrimAge acceleration	Colorectal cancer	302506	rs9386796	0.107917	0.0423601	0.0108461
GrimAge acceleration	Colorectal cancer	302506	All - Inverse variance weighted	0.118928	0.0355845	0.000831414
GrimAge acceleration	Colorectal cancer	302506	All - MR Egger	0.803639	0.544138	0.27773
HannumAge acceleration	Colorectal cancer	302506	rs1005277	-0.0419162	0.0309381	0.175469
HannumAge acceleration	Colorectal cancer	302506	rs10786282	-0.00694444	0.0286111	0.808224
HannumAge acceleration	Colorectal cancer	302506	rs111731678	0	0.0467785	1
HannumAge acceleration	Colorectal cancer	302506	rs12417758	-0.0234114	0.0401338	0.559669
HannumAge acceleration	Colorectal cancer	302506	rs1598856	-0.050592	0.0446717	0.257412
HannumAge acceleration	Colorectal cancer	302506	rs3093956	0.275947	0.0477759	7.65601e-09
HannumAge acceleration	Colorectal cancer	302506	rs34970912	0.0799923	0.0481489	0.0966423
HannumAge acceleration	Colorectal cancer	302506	rs4383328	0.0254103	0.0502912	0.613374
HannumAge acceleration	Colorectal cancer	302506	rs4838595	0.00737578	0.0481366	0.87822
HannumAge acceleration	Colorectal cancer	302506	All - Inverse variance weighted	0.0137985	0.029607	0.641177
HannumAge acceleration	Colorectal cancer	302506	All - MR Egger	0.0356244	0.119097	0.773534
Intrinsic HorvathAge acceleration	Colorectal cancer	302506	rs10447389	-0.0177279	0.0340087	0.602174
Intrinsic HorvathAge acceleration	Colorectal cancer	302506	rs10732882	0.0569647	0.035343	0.107013
Intrinsic HorvathAge acceleration	Colorectal cancer	302506	rs10735418	0.0680655	0.0435005	0.117652
Intrinsic HorvathAge acceleration	Colorectal cancer	302506	rs10949481	-0.016816	0.0194031	0.386125
Intrinsic HorvathAge acceleration	Colorectal cancer	302506	rs12043492	0.00507849	0.0392428	0.897032
Intrinsic HorvathAge acceleration	Colorectal cancer	302506	rs12666349	0.033752	0.043956	0.442572
Intrinsic HorvathAge acceleration	Colorectal cancer	302506	rs12903325	-0.051444	0.0442238	0.244722
Intrinsic HorvathAge acceleration	Colorectal cancer	302506	rs144317085	0.0188863	0.0432243	0.662157
Intrinsic HorvathAge acceleration	Colorectal cancer	302506	rs1488106	-0.0197044	0.0470717	0.675505
Intrinsic HorvathAge acceleration	Colorectal cancer	302506	rs1511762	0.010598	0.0382286	0.781605
Intrinsic HorvathAge acceleration	Colorectal cancer	302506	rs1726672	0.0147203	0.0441609	0.738883
Intrinsic HorvathAge acceleration	Colorectal cancer	302506	rs2275558	0.0389722	0.0496788	0.432757
Intrinsic HorvathAge acceleration	Colorectal cancer	302506	rs2492286	-0.0299145	0.0416667	0.472789
Intrinsic HorvathAge acceleration	Colorectal cancer	302506	rs2736099	-0.269991	0.0378332	9.58323e-13
Intrinsic HorvathAge acceleration	Colorectal cancer	302506	rs34003787	0.0185242	0.0490892	0.705907
Intrinsic HorvathAge acceleration	Colorectal cancer	302506	rs3917672	-0.0343249	0.0320366	0.283977
Intrinsic HorvathAge acceleration	Colorectal cancer	302506	rs4240228	0.0200236	0.0372988	0.591377
Intrinsic HorvathAge acceleration	Colorectal cancer	302506	rs57941717	-0.0464237	0.0337001	0.168342
Intrinsic HorvathAge acceleration	Colorectal cancer	302506	rs6414374	0.0345364	0.0373367	0.354966
Intrinsic HorvathAge acceleration	Colorectal cancer	302506	rs6577536	0.0289634	0.0426829	0.497409
Intrinsic HorvathAge acceleration	Colorectal cancer	302506	rs75243280	0.0542402	0.0391735	0.16617
Intrinsic HorvathAge acceleration	Colorectal cancer	302506	rs7550821	0.0552724	0.0395923	0.162703
Intrinsic HorvathAge acceleration	Colorectal cancer	302506	rs7627756	0.0171138	0.0388529	0.659592
Intrinsic HorvathAge acceleration	Colorectal cancer	302506	rs79111787	-0.0260026	0.0361393	0.471825
Intrinsic HorvathAge acceleration	Colorectal cancer	302506	All - Inverse variance weighted	-0.00619347	0.0131771	0.638342
Intrinsic HorvathAge acceleration	Colorectal cancer	302506	All - MR Egger	-0.0198477	0.0358994	0.585926
PhenoAge acceleration	Colorectal cancer	302506	rs11190127	0.127617	0.0350242	0.000268769
PhenoAge acceleration	Colorectal cancer	302506	rs11253338	-0.00983837	0.0393535	0.802587
PhenoAge acceleration	Colorectal cancer	302506	rs1142345	-0.0223437	0.0256223	0.383188
PhenoAge acceleration	Colorectal cancer	302506	rs116853700	-0.0333515	0.0378829	0.378652
PhenoAge acceleration	Colorectal cancer	302506	rs1990053	-0.0781189	0.0330354	0.0180444
PhenoAge acceleration	Colorectal cancer	302506	rs3829957	0.0129083	0.026607	0.627571
PhenoAge acceleration	Colorectal cancer	302506	rs6531114	0.0133753	0.0381589	0.725952
PhenoAge acceleration	Colorectal cancer	302506	rs678553	0.00520674	0.0278714	0.851807
PhenoAge acceleration	Colorectal cancer	302506	rs7228835	-0.0400467	0.0248834	0.107534
PhenoAge acceleration	Colorectal cancer	302506	rs73028070	-0.003465	0.036729	0.924839
PhenoAge acceleration	Colorectal cancer	302506	rs752223	-0.0258836	0.0276687	0.349539
PhenoAge acceleration	Colorectal cancer	302506	All - Inverse variance weighted	-0.00842382	0.014207	0.553225
PhenoAge acceleration	Colorectal cancer	302506	All - MR Egger	-0.0582707	0.0398688	0.177879
GrimAge acceleration	Lung cancer	577510	rs17094148	-0.0238889	0.0822222	0.771403
GrimAge acceleration	Lung cancer	577510	rs4065321	-0.0111568	0.0804463	0.889698
GrimAge acceleration	Lung cancer	577510	rs887466	0.426867	0.116183	0.000238683
GrimAge acceleration	Lung cancer	577510	rs9386796	0.0665658	0.0695915	0.338809
GrimAge acceleration	Lung cancer	577510	All - Inverse variance weighted	0.0687999	0.0819917	0.401409
GrimAge acceleration	Lung cancer	577510	All - MR Egger	1.14534	1.40469	0.500521
HannumAge acceleration	Lung cancer	577510	rs1005277	0.0272788	0.0518962	0.599138
HannumAge acceleration	Lung cancer	577510	rs10786282	-0.0125	0.0466667	0.788809
HannumAge acceleration	Lung cancer	577510	rs111731678	-0.107679	0.076346	0.15842
HannumAge acceleration	Lung cancer	577510	rs12417758	-0.0453894	0.0659341	0.491197
HannumAge acceleration	Lung cancer	577510	rs1598856	-0.058127	0.117869	0.621906
HannumAge acceleration	Lung cancer	577510	rs3093956	0.266063	0.12603	0.0347628
HannumAge acceleration	Lung cancer	577510	rs34970912	0.011126	0.0790332	0.888046
HannumAge acceleration	Lung cancer	577510	rs4383328	-0.0566437	0.082054	0.489991
HannumAge acceleration	Lung cancer	577510	rs4838595	0.058618	0.0807453	0.467862
HannumAge acceleration	Lung cancer	577510	All - Inverse variance weighted	-0.00524861	0.0240797	0.827454
HannumAge acceleration	Lung cancer	577510	All - MR Egger	0.0684897	0.0916136	0.479062
Intrinsic HorvathAge acceleration	Lung cancer	577510	rs10447389	-0.121201	0.0571635	0.0339847
Intrinsic HorvathAge acceleration	Lung cancer	577510	rs10732882	0.0212058	0.0586279	0.717575
Intrinsic HorvathAge acceleration	Lung cancer	577510	rs10735418	-0.0481064	0.0721597	0.504985
Intrinsic HorvathAge acceleration	Lung cancer	577510	rs10949481	0.00286427	0.031507	0.927565
Intrinsic HorvathAge acceleration	Lung cancer	577510	rs12043492	-0.0286242	0.066482	0.666792
Intrinsic HorvathAge acceleration	Lung cancer	577510	rs12666349	-0.0553375	0.0690738	0.423053
Intrinsic HorvathAge acceleration	Lung cancer	577510	rs12903325	-0.0785199	0.0722022	0.276816
Intrinsic HorvathAge acceleration	Lung cancer	577510	rs144317085	0.00798287	0.0765187	0.916911
Intrinsic HorvathAge acceleration	Lung cancer	577510	rs1488106	0.105638	0.0793651	0.183178
Intrinsic HorvathAge acceleration	Lung cancer	577510	rs1511762	0.0215746	0.0662377	0.744641
Intrinsic HorvathAge acceleration	Lung cancer	577510	rs1726672	-0.0765456	0.0736016	0.29834
Intrinsic HorvathAge acceleration	Lung cancer	577510	rs2275558	-0.0518201	0.0865096	0.549166
Intrinsic HorvathAge acceleration	Lung cancer	577510	rs2492286	-0.14245	0.0690883	0.0392215
Intrinsic HorvathAge acceleration	Lung cancer	577510	rs2736099	0.38779	0.0717971	6.61975e-08
Intrinsic HorvathAge acceleration	Lung cancer	577510	rs34003787	-0.131831	0.0790367	0.0953219
Intrinsic HorvathAge acceleration	Lung cancer	577510	rs3917672	-0.129672	0.0541571	0.0166491
Intrinsic HorvathAge acceleration	Lung cancer	577510	rs4240228	-0.0424028	0.0608559	0.485944
Intrinsic HorvathAge acceleration	Lung cancer	577510	rs57941717	0.0594911	0.0557084	0.285565
Intrinsic HorvathAge acceleration	Lung cancer	577510	rs6414374	-0.0802738	0.0603609	0.183552
Intrinsic HorvathAge acceleration	Lung cancer	577510	rs6577536	-0.097561	0.0721545	0.176339
Intrinsic HorvathAge acceleration	Lung cancer	577510	rs75243280	-0.0193715	0.0658631	0.768668
Intrinsic HorvathAge acceleration	Lung cancer	577510	rs7550821	0.0211682	0.0638965	0.740427
Intrinsic HorvathAge acceleration	Lung cancer	577510	rs7627756	0.0420907	0.0647549	0.515692
Intrinsic HorvathAge acceleration	Lung cancer	577510	rs79111787	-0.182239	0.0446232	4.42764e-05
Intrinsic HorvathAge acceleration	Lung cancer	577510	All - Inverse variance weighted	-0.0312014	0.0214507	0.145791
Intrinsic HorvathAge acceleration	Lung cancer	577510	All - MR Egger	-0.0750509	0.0544435	0.181904
PhenoAge acceleration	Lung cancer	577510	rs11190127	-0.0736715	0.0567633	0.194331
PhenoAge acceleration	Lung cancer	577510	rs11253338	-0.0147576	0.0643008	0.818474
PhenoAge acceleration	Lung cancer	577510	rs1142345	-0.00364299	0.0416515	0.930303
PhenoAge acceleration	Lung cancer	577510	rs116853700	0.0522023	0.0583651	0.371103
PhenoAge acceleration	Lung cancer	577510	rs1990053	-0.0318694	0.0544112	0.558068
PhenoAge acceleration	Lung cancer	577510	rs3829957	-0.0360906	0.044784	0.420311
PhenoAge acceleration	Lung cancer	577510	rs6531114	-0.122345	0.0629426	0.0519256
PhenoAge acceleration	Lung cancer	577510	rs678553	-0.0346095	0.0468606	0.460173
PhenoAge acceleration	Lung cancer	577510	rs7228835	-0.0515163	0.0433515	0.234699
PhenoAge acceleration	Lung cancer	577510	rs73028070	-0.018249	0.0628321	0.771479
PhenoAge acceleration	Lung cancer	577510	rs752223	-0.0046412	0.0448054	0.917498
PhenoAge acceleration	Lung cancer	577510	All - Inverse variance weighted	-0.0289318	0.0153395	0.0592816
PhenoAge acceleration	Lung cancer	577510	All - MR Egger	0.0331886	0.0441792	0.471702
GrimAge acceleration	Ovarian cancer	366231	rs17094148	-0.0888889	0.0744444	0.232466
GrimAge acceleration	Ovarian cancer	366231	rs4065321	0.0687023	0.0722255	0.341493
GrimAge acceleration	Ovarian cancer	366231	rs887466	-0.0171162	0.064834	0.79178
GrimAge acceleration	Ovarian cancer	366231	rs9386796	-0.00504286	0.0615229	0.934673
GrimAge acceleration	Ovarian cancer	366231	All - Inverse variance weighted	-0.00946348	0.033821	0.779622
GrimAge acceleration	Ovarian cancer	366231	All - MR Egger	-0.294213	0.574832	0.659687
HannumAge acceleration	Ovarian cancer	366231	rs1005277	0.0409182	0.0449102	0.362237
HannumAge acceleration	Ovarian cancer	366231	rs10786282	-0.0638889	0.0422222	0.13024
HannumAge acceleration	Ovarian cancer	366231	rs111731678	0.00441306	0.0723742	0.951379
HannumAge acceleration	Ovarian cancer	366231	rs12417758	0.0253225	0.0597229	0.671566
HannumAge acceleration	Ovarian cancer	366231	rs1598856	-0.0635091	0.065662	0.333438
HannumAge acceleration	Ovarian cancer	366231	rs3093956	0.0337727	0.0691928	0.625482
HannumAge acceleration	Ovarian cancer	366231	rs34970912	0.0197583	0.0744293	0.790652
HannumAge acceleration	Ovarian cancer	366231	rs4383328	0.00105876	0.0725251	0.988352
HannumAge acceleration	Ovarian cancer	366231	rs4838595	0.0446429	0.0729814	0.540735
HannumAge acceleration	Ovarian cancer	366231	All - Inverse variance weighted	-0.00124052	0.019892	0.950274
HannumAge acceleration	Ovarian cancer	366231	All - MR Egger	-0.0120097	0.0755715	0.878221
Intrinsic HorvathAge acceleration	Ovarian cancer	366231	rs10447389	-0.00615051	0.0495658	0.901246
Intrinsic HorvathAge acceleration	Ovarian cancer	366231	rs10732882	-0.0482328	0.0532225	0.364804
Intrinsic HorvathAge acceleration	Ovarian cancer	366231	rs10735418	-0.0573183	0.172467	0.739629
Intrinsic HorvathAge acceleration	Ovarian cancer	366231	rs10949481	0.047861	0.0283655	0.0915464
Intrinsic HorvathAge acceleration	Ovarian cancer	366231	rs12043492	0.0221607	0.0577101	0.700978
Intrinsic HorvathAge acceleration	Ovarian cancer	366231	rs12666349	0.00706436	0.0757457	0.925694
Intrinsic HorvathAge acceleration	Ovarian cancer	366231	rs12903325	-0.0988267	0.0654332	0.130955
Intrinsic HorvathAge acceleration	Ovarian cancer	366231	rs144317085	-0.0309579	0.0634735	0.625741
Intrinsic HorvathAge acceleration	Ovarian cancer	366231	rs1488106	0.044335	0.0689655	0.520317
Intrinsic HorvathAge acceleration	Ovarian cancer	366231	rs1511762	0.0325511	0.0560182	0.561186
Intrinsic HorvathAge acceleration	Ovarian cancer	366231	rs1726672	-0.172718	0.0662414	0.00912307
Intrinsic HorvathAge acceleration	Ovarian cancer	366231	rs2275558	0.0925054	0.0779443	0.235301
Intrinsic HorvathAge acceleration	Ovarian cancer	366231	rs2492286	0.00641026	0.0633903	0.919452
Intrinsic HorvathAge acceleration	Ovarian cancer	366231	rs2736099	0.163801	0.0550301	0.002915
Intrinsic HorvathAge acceleration	Ovarian cancer	366231	rs34003787	-0.0645261	0.071627	0.367662
Intrinsic HorvathAge acceleration	Ovarian cancer	366231	rs3917672	-0.0999237	0.0469108	0.0331649
Intrinsic HorvathAge acceleration	Ovarian cancer	366231	rs4240228	-0.000785238	0.0537888	0.988352
Intrinsic HorvathAge acceleration	Ovarian cancer	366231	rs57941717	0.00618982	0.0502063	0.901879
Intrinsic HorvathAge acceleration	Ovarian cancer	366231	rs6414374	-0.0435594	0.0563161	0.439238
Intrinsic HorvathAge acceleration	Ovarian cancer	366231	rs6577536	0.0447154	0.0630081	0.477904
Intrinsic HorvathAge acceleration	Ovarian cancer	366231	rs75243280	0.0154972	0.0598364	0.795641
Intrinsic HorvathAge acceleration	Ovarian cancer	366231	rs7550821	-0.0176401	0.0568405	0.756299
Intrinsic HorvathAge acceleration	Ovarian cancer	366231	rs7627756	0	0.0568918	1
Intrinsic HorvathAge acceleration	Ovarian cancer	366231	rs79111787	-0.0522257	0.0528867	0.323398
Intrinsic HorvathAge acceleration	Ovarian cancer	366231	All - Inverse variance weighted	-0.00151621	0.0134112	0.909987
Intrinsic HorvathAge acceleration	Ovarian cancer	366231	All - MR Egger	0.0195073	0.0357574	0.590868
PhenoAge acceleration	Ovarian cancer	366231	rs11190127	-0.0587762	0.0515298	0.254026
PhenoAge acceleration	Ovarian cancer	366231	rs11253338	0.009487	0.0562193	0.865993
PhenoAge acceleration	Ovarian cancer	366231	rs1142345	0.0465088	0.0376442	0.21665
PhenoAge acceleration	Ovarian cancer	366231	rs116853700	-0.0034439	0.0574588	0.952206
PhenoAge acceleration	Ovarian cancer	366231	rs1990053	0.00660707	0.0478041	0.890073
PhenoAge acceleration	Ovarian cancer	366231	rs3829957	-0.00184405	0.0403056	0.963508
PhenoAge acceleration	Ovarian cancer	366231	rs6531114	-0.0326515	0.0550747	0.553277
PhenoAge acceleration	Ovarian cancer	366231	rs678553	-0.0888208	0.0419602	0.0342778
PhenoAge acceleration	Ovarian cancer	366231	rs7228835	-0.00486003	0.0377138	0.897464
PhenoAge acceleration	Ovarian cancer	366231	rs73028070	-0.019404	0.0563641	0.730649
PhenoAge acceleration	Ovarian cancer	366231	rs752223	-0.0523027	0.0405212	0.196791
PhenoAge acceleration	Ovarian cancer	366231	All - Inverse variance weighted	-0.0167053	0.013763	0.224832
PhenoAge acceleration	Ovarian cancer	366231	All - MR Egger	0.0267768	0.03982	0.51819
GrimAge acceleration	Prostate cancer	403875	rs17094148	-0.0522222	0.0405556	0.19786
GrimAge acceleration	Prostate cancer	403875	rs4065321	-0.0704639	0.0393423	0.0732861
GrimAge acceleration	Prostate cancer	403875	rs887466	-0.214212	0.0352697	1.25129e-09
GrimAge acceleration	Prostate cancer	403875	rs9386796	0.00958144	0.0342915	0.779929
GrimAge acceleration	Prostate cancer	403875	All - Inverse variance weighted	-0.0829779	0.0499932	0.0969578
GrimAge acceleration	Prostate cancer	403875	All - MR Egger	-0.102816	1.02335	0.929135
HannumAge acceleration	Prostate cancer	403875	rs1005277	0.0319361	0.0252828	0.206532
HannumAge acceleration	Prostate cancer	403875	rs10786282	0.00472222	0.0233333	0.839619
HannumAge acceleration	Prostate cancer	403875	rs111731678	-0.0154457	0.0397176	0.697358
HannumAge acceleration	Prostate cancer	403875	rs12417758	0.0105112	0.0334448	0.753304
HannumAge acceleration	Prostate cancer	403875	rs1598856	0.0333692	0.0360603	0.354772
HannumAge acceleration	Prostate cancer	403875	rs3093956	-0.247941	0.0403624	8.10502e-10
HannumAge acceleration	Prostate cancer	403875	rs34970912	-0.0306925	0.0416267	0.460923
HannumAge acceleration	Prostate cancer	403875	rs4383328	-0.0714664	0.0397035	0.0718606
HannumAge acceleration	Prostate cancer	403875	rs4838595	-0.0555124	0.0407609	0.173228
HannumAge acceleration	Prostate cancer	403875	All - Inverse variance weighted	-0.0202763	0.0256527	0.429284
HannumAge acceleration	Prostate cancer	403875	All - MR Egger	0.0120274	0.102876	0.910214
Intrinsic HorvathAge acceleration	Prostate cancer	403875	rs10447389	-0.0694645	0.0278582	0.0126488
Intrinsic HorvathAge acceleration	Prostate cancer	403875	rs10732882	-0.0016632	0.029106	0.954431
Intrinsic HorvathAge acceleration	Prostate cancer	403875	rs10735418	-0.00665302	0.0353122	0.850559
Intrinsic HorvathAge acceleration	Prostate cancer	403875	rs10949481	-0.00600573	0.0157997	0.703859
Intrinsic HorvathAge acceleration	Prostate cancer	403875	rs12043492	-0.0918744	0.031856	0.00392586
Intrinsic HorvathAge acceleration	Prostate cancer	403875	rs12666349	-0.00863422	0.038854	0.824141
Intrinsic HorvathAge acceleration	Prostate cancer	403875	rs12903325	0.0460289	0.0356498	0.196655
Intrinsic HorvathAge acceleration	Prostate cancer	403875	rs144317085	-0.0397196	0.0344626	0.249098
Intrinsic HorvathAge acceleration	Prostate cancer	403875	rs1488106	-0.0218938	0.0383142	0.567709
Intrinsic HorvathAge acceleration	Prostate cancer	403875	rs1511762	-0.0185466	0.0314156	0.554948
Intrinsic HorvathAge acceleration	Prostate cancer	403875	rs1726672	0.00196271	0.0368008	0.957466
Intrinsic HorvathAge acceleration	Prostate cancer	403875	rs2275558	0.0513919	0.04197	0.220768
Intrinsic HorvathAge acceleration	Prostate cancer	403875	rs2492286	-0.0480769	0.0352564	0.172682
Intrinsic HorvathAge acceleration	Prostate cancer	403875	rs2736099	0.0253654	0.0309544	0.412533
Intrinsic HorvathAge acceleration	Prostate cancer	403875	rs34003787	-0.0101883	0.0398271	0.798094
Intrinsic HorvathAge acceleration	Prostate cancer	403875	rs3917672	-0.0167811	0.0259344	0.517594
Intrinsic HorvathAge acceleration	Prostate cancer	403875	rs4240228	-0.0526109	0.0294464	0.0739914
Intrinsic HorvathAge acceleration	Prostate cancer	403875	rs57941717	-0.00343879	0.0275103	0.900524
Intrinsic HorvathAge acceleration	Prostate cancer	403875	rs6414374	0.0258245	0.0308027	0.401815
Intrinsic HorvathAge acceleration	Prostate cancer	403875	rs6577536	-0.0309959	0.0345528	0.369688
Intrinsic HorvathAge acceleration	Prostate cancer	403875	rs75243280	-0.087387	0.057684	0.129791
Intrinsic HorvathAge acceleration	Prostate cancer	403875	rs7550821	-0.0239122	0.0313603	0.445762
Intrinsic HorvathAge acceleration	Prostate cancer	403875	rs7627756	0.157724	0.0314524	5.31147e-07
Intrinsic HorvathAge acceleration	Prostate cancer	403875	rs79111787	0.0139929	0.0243499	0.565521
Intrinsic HorvathAge acceleration	Prostate cancer	403875	All - Inverse variance weighted	-0.00743255	0.0095732	0.437518
Intrinsic HorvathAge acceleration	Prostate cancer	403875	All - MR Egger	-0.00841757	0.0250968	0.740497
PhenoAge acceleration	Prostate cancer	403875	rs11190127	-0.0165056	0.0281804	0.558068
PhenoAge acceleration	Prostate cancer	403875	rs11253338	0.0368939	0.031272	0.23809
PhenoAge acceleration	Prostate cancer	403875	rs1142345	-0.0099575	0.0210079	0.635508
PhenoAge acceleration	Prostate cancer	403875	rs116853700	0.0391517	0.0304513	0.198543
PhenoAge acceleration	Prostate cancer	403875	rs1990053	0.0870579	0.0264283	0.000987312
PhenoAge acceleration	Prostate cancer	403875	rs3829957	-0.0165964	0.0216017	0.442313
PhenoAge acceleration	Prostate cancer	403875	rs6531114	-0.0121951	0.0298977	0.683351
PhenoAge acceleration	Prostate cancer	403875	rs678553	-0.00643185	0.0232772	0.782306
PhenoAge acceleration	Prostate cancer	403875	rs7228835	-0.00660964	0.0206065	0.748396
PhenoAge acceleration	Prostate cancer	403875	rs73028070	0.021714	0.030492	0.47639
PhenoAge acceleration	Prostate cancer	403875	rs752223	0.0473045	0.0226705	0.036923
PhenoAge acceleration	Prostate cancer	403875	All - Inverse variance weighted	0.0114013	0.0101244	0.260116
PhenoAge acceleration	Prostate cancer	403875	All - MR Egger	-0.000458563	0.0307671	0.988434
* These results were obtained using meta-analysed GWAS data including the UK Biobank, FinnGen and International consortia
* For colorectal cancer, the fixed effect meta-analysis only included GECCO and FinnGen
* Lung cancer meta-analysis included GECCO, FinnGen and unadjusted UK Biobank data

[truncated: 8 more sheets: S10. Q and Egger Test, S11. MR Subtypes (consortia) , S12. MR Parental history in UKB, S13. LD Score, S14. Bidirectional MR, S15. Steiger filtering, S16. Filtered Bidirectional MR, S17. Preexisting evidence]
